# Supplementary material for: Midkine is a dual regulator of wound epidermis development and inflammation during the initiation of limb regeneration
Source: eLife. 2020 Jan 14;9:e50765. doi: 10.7554/eLife.50765 (PMC6959999; doi:10.7554/eLife.50765)
Supplement: Figure 1—source data 1. [file elife-50765-fig1-data1.csv]

	Z-score
Pathways	2N	FSF 2N	4N	FSF 4N
Neuregulin Signaling	-3.207134903	-4	-2.828427125	-2.236067977		Pos. Z-score predicts activation
PDGF Signaling	-1.459600898	-3.709704134	-1.154700538	-2.236067977		Neg. Z-score predicts repression/inhibition
CXCR4 Signaling	-2.197401062	-2.69407953	-2.828427125	-1.632993162		0 or N/A indicates no predicted activation/repression
IGF-1 Signaling	-2.449489743	-3.577708764	-1.264911064	-1.341640786
HGF Signaling	-1.963961012	-3.709704134	-2.110579412	-1.632993162
Growth Hormone Signaling	-1.885618083	-4.146139914	-1.507556723	-1
VEGF Signaling	-3.299831646	-3.273268354	-1.133893419	-1
NGF Signaling	-0.625543242	-2.984810029	-2.333333333	-1.632993162
Notch Signaling	-1.133893419	-1.666666667	-2	0
HIPPO signaling	2.529822128	1.414213562	1	0
TGF-beta Signaling	-1.069044968	-1.386750491	1.414213562	0
Wnt/Beta-catenin Signaling	0.755928946	0.39223227	0.577350269	-0.377964473
BMP signaling pathway	0	-1.507556723	-1.341640786	0
Wnt/Ca+ pathway	-2.110579412	-3.31662479	-2	0
PCP pathway	-1.807392228	-2.333333333	0	0
FGF Signaling	-2.523573073	-4.024922359	-1	0
