# Supplementary material for: Midkine is a dual regulator of wound epidermis development and inflammation during the initiation of limb regeneration
Source: eLife. 2020 Jan 14;9:e50765. doi: 10.7554/eLife.50765 (PMC6959999; doi:10.7554/eLife.50765)
Supplement: Figure 2—source data 1. [file elife-50765-fig2-data1.xlsx]

## Sheet: Sheet1
mk/pecam	0 dpa
sample	mk+ only	pecam+ only	mk+pecam+	% pecam+/mk+	Average		Total number of cells counted
1	400	259	29	6.75991	7.71957		1693
2	346	259	18	4.94505
3	201	155	26	11.4537
	3 dpa
1	425	287	21	4.70852	3.90293		1180
2	219	221	7	3.09735
	7 dpa
1	77	37	2	2.53165	5.02361		274
2	56	24	2	3.44828
3	50	21	5	9.09091
mk/pax7	0 dpa
sample	mk+ only	pax7+ only	mk+pax7+	% pax7+/mk+
1	118	3	216	64.6707	44.9211		1073
2	173	3	131	43.0921
3	213	29	187	46.75
	3 dpa
1	244	44	198	44.7964	37.3797		1579
2	431	15	190	30.5958
3	210	125	122	36.747
	7 dpa
1	73	30	59	44.697	36.7186		456
2	78	26	30	27.7778
3	86	22	52	37.6812
mk/prrx-1	0 dpa
sample	mk+ only	prrx-1+ only	mk+prrx-1+	% prrx-1+/mk+
1	330	58	406	55.163	43.754		1723
2	279	49	294	51.3089
3	179	69	59	24.7899
	3 dpa
1	129	166	149	53.5971	53.5971		444
	7 dpa
1	201	213	323	61.6412	53.284		1043
2	54	64	34	38.6364
3	38	60	56	59.5745
mk/csf1r	5 dpa
sample	mk+ only	csf1r+ only	mk+csf1r+	% csf1r+/mk+
	153	413	16	9.46746			582
