# Supplementary material for: Midkine is a dual regulator of wound epidermis development and inflammation during the initiation of limb regeneration
Source: eLife. 2020 Jan 14;9:e50765. doi: 10.7554/eLife.50765 (PMC6959999; doi:10.7554/eLife.50765)
Supplement: Figure 8—source data 1. [file elife-50765-fig8-data1.csv]

Transcript ID	Transcript	0dpa_2N_1	0dpa_2N_2	0dpa_2N_3	0dpa_4N_1	0dpa_4N_2	0dpa_4N_3	0dpa_WE_1	0dpa_WE_2	0dpa_WE_3	4dpa_2N_1	4dpa_2N_2	4dpa_2N_3	4dpa_4N_1	4dpa_4N_2	4dpa_4N_3	4dpa_WE_1	4dpa_WE_2	4dpa_WE_3	5dpa_2N_1	5dpa_2N_2	5dpa_2N_3	5dpa_4N_1	5dpa_4N_2	5dpa_4N_3	5dpa_WE_1	5dpa_WE_2	5dpa_WE_3
c1055997_g1_i1	sdc1	1.78	1.587	1.282	4.643	3.02	1.648	10.291	9.089	10.32	2.424	2.253	3.636	6.87	9.001	8.343	11.592	14.043	9.018	4.295	3.693	1.946	11.197	5.778	10.195	11.133	12.518	6.789
c1071119_g1_i1	sdc2	1.312	0.776	0.48	0.515	0.103	0.196	0.262	0.169	0.053	0.167	0.375	0.518	0.239	0.772	0.897	0	0.448	0.187	0.666	0.354	0.094	0.72	0.731	0.266	0.577	0.452	0.047
c1078104_g3_i2	sdc3	1.288	1.993	1.044	0.528	0.841	1.009	0	0.267	0.106	0.699	0.749	0	0	1.244	0.643	0.119	0.162	0.109	0.761	0.678	0.811	0.668	0.913	1.068	0.148	0.174	0
c1069904_g3_i1	sdc4	0.696	0.86	0.377	2.169	0.401	2.47	3.47	3.845	2.458	1.185	1.186	1.514	0.691	0.507	1.728	3.962	2.443	8.542	1.028	0.954	0.988	0.584	0.365	0.553	5.602	2.6	2.48
c1088780_g4_i1	integrin b1	0.732	0.178	0.948	1.016	0.261	0.187	0.141	0.31	0.241	1.48	0.639	0.872	1.931	1.017	1.468	0.375	0.492	0.207	1.471	1.454	1.174	2.394	1.279	2.464	0.452	0.246	0.621
c1088780_g4_i2	integrin b1	2.698	4.557	3.159	1.149	4.177	2.749	0.254	0.46	0.523	1.483	1.43	2.81	1.542	2.901	3.192	0.971	1.136	0.659	1.706	1.309	1.598	2.584	2.414	2.974	1.308	1.037	0.265
c1075823_g2_i1	integrin a4	0.173	0.137	0.148	0.021	0.064	0.254	0	0.008	0	0.388	0.759	0.507	0.252	0.423	0.375	0.096	0.047	0.049	0.19	0.52	0.411	0.398	0.371	0.455	0.069	0.055	0
c1075823_g2_i2	integrin a4	0.043	0	0.284	0.085	0.332	0	0.043	0	0.012	0.712	0.577	0.246	0.505	0.419	0.354	0.053	0	0.05	0.324	0.094	0.493	0.231	0.142	0.356	0	0.019	0
c1082824_g3_i5	integrin a6	0.415	0.197	0.224	0.382	0.058	0.616	0.375	0.123	0.747	0.151	0.156	0	0.314	0.125	0.251	0.914	2.046	1.337	0.208	0.109	0.105	0	0.189	0.184	0.399	0.785	0
c1084889_g2_i1	lrp1	3.448	3.791	2.918	1.25	2.596	1.59	0.397	0.528	0.318	2.848	2.354	3.023	2.214	2.647	3.394	0.463	0.308	0.352	3.741	3.33	3.987	2.718	3.563	3.353	0.581	0.459	0.303
c1084889_g3_i1	lrp1	5.208	5.971	4.23	1.797	3.1	2.845	0.703	0.409	0.567	3.546	3.436	3.917	2.766	3.761	5.944	0.623	0.478	0.469	5.72	4.324	5.656	4.42	5.426	5.642	0.938	0.656	0.491
c1083357_g2_i1	ptprz	0	0.073	0	0	0	0	1.432	1.164	0.867	0.025	0	0	0	0	0	0.329	0.466	0.815	0	0	0	0	0	0	0.84	0.999	1.077
c1091395_g2_i1	notch2	2.476	2.563	1.285	1.268	0.705	1.125	0.992	1.303	0.856	0.186	0.177	0.217	0.347	0.598	0.372	0.818	0.573	1.341	0.477	0.363	0.342	0.527	0.477	0.823	1.115	0.86	0.18
c1091395_g2_i2	notch2	1.838	2.257	1.987	1.161	2.272	1.562	1.31	0.807	0.757	0.376	0.341	0.362	0.593	0.666	0.773	0.801	0.769	0.886	0.458	0.581	0.322	1.186	0.934	0.871	1.392	1.324	0.654
c1078639_g1_i1	versican	6.541	10.752	9.626	3.186	9.076	7.669	0.548	0.508	0.518	9.9	7.431	12.073	9.57	11.13	11.85	2.032	0.815	1.452	7.844	9.425	8.999	11.834	10.995	12.074	1.623	1.118	1.436
c1079812_g15_i1	versican	11.31	18.344	19.592	4.56	15.916	11.461	0.611	0.651	0.866	21.536	15.049	21.079	20.726	22.109	20.917	4.284	1.607	1.684	15.117	17.288	19.527	23.147	19.907	25.155	2.744	2.051	2.401
c1079812_g15_i2	versican	0.599	0.146	1.125	0.302	0.219	0.642	0.142	0	0.264	2.805	1.453	1.334	1.748	2.211	0.6	0.16	0.106	0.031	1.382	2.526	0.838	1.607	3.296	2.01	0.403	0.186	0.017
c1070741_g1_i5	nucleolin	11.361	11.046	10.856	24.461	14.65	16.02	23.464	25.878	31.052	9.036	10.596	17.26	14.674	17.016	19.615	23.063	30.381	14.313	14.067	6.977	8.598	20.91	8.404	14.741	23.631	27.648	23.239
c1070741_g1_i3	nucleolin	6.206	8.726	3.834	8.575	5.556	6.011	11.595	9.017	14.155	6.272	6.804	9.158	7.531	9.134	8.564	10.477	12.871	7.927	5.62	4.135	4.466	7.084	5.951	6.694	11.712	13.492	10.558
c1070741_g1_i2	nucleolin	1.328	0.897	2.147	3.185	1.933	0.788	2.262	2.127	2.381	0.384	1.57	1.17	0.632	2.204	1.202	2.344	4.56	1.318	1.275	0.89	0.857	1.832	0.942	0.499	2.16	3.315	1.272
