# Supplementary material for: Midkine is a dual regulator of wound epidermis development and inflammation during the initiation of limb regeneration
Source: eLife. 2020 Jan 14;9:e50765. doi: 10.7554/eLife.50765 (PMC6959999; doi:10.7554/eLife.50765)
Supplement: Supplementary file 1. — This excel table contains the list of differentially expressed transcripts in dividing cells (enriched for progenitors) in both conditions at 5 dpa. The respective fold change, blastx hit, and adjusted p-values are listed for each hit. [file elife-50765-supp1.xlsx]

## Sheet: Top_FSF_4N
transcript id	blastx hit	logFC	padj
c1087956_g9_i4	EWS_HUMAN	5.59944	4e-11		Note: positive fold change indicates enrichment in regenerating 4N, negative fold change indicates enrichment in FSF 4N
c1090300_g1_i1	CNN2_MOUSE	10.1719	2.07e-10
c1090687_g2_i3	PTBP1_BOVIN	10.4882	5.69e-10
c1091001_g2_i3	CDCA2_HUMAN	8.62454	1.6e-09
c1083454_g6_i2	ZBTB3_HUMAN	9.26658	4.48e-08
c1086809_g3_i3	BI1_BOVIN	9.37709	4.48e-08
c1082127_g2_i6	HERC1_HUMAN	7.82504	6.6e-08
c1090706_g8_i5	STAM2_HUMAN	9.33168	2.98e-07
c1049691_g1_i1	MPI1B_XENLA	-9.11105	3.28e-07
c1091340_g1_i3	K0317_MOUSE	8.89328	5.17e-07
c1091444_g2_i5	MPP5_HUMAN	-9.41016	1.24e-06
c1083468_g1_i3	ELYS_HUMAN	8.93428	1.46e-06
c1078658_g1_i1	RS10_HUMAN	8.95977	1.6e-06
c1075582_g1_i3	NU155_HUMAN	-9.18764	2.42e-06
c1089782_g7_i2	PPARD_CANFA	8.78497	2.66e-06
c1070268_g1_i5	ZC3HF_HUMAN	7.37441	2.92e-06
c1088530_g5_i1	WNK1_HUMAN	8.44716	3.17e-06
c1074527_g1_i10	EXOC3_MOUSE	-8.75286	3.17e-06
c1083410_g1_i2	PDCD4_MOUSE	8.49949	3.17e-06
c1080761_g5_i1	CO1A2_CHICK	7.99823	4.01e-06
c1077444_g4_i5	UNC5B_XENLA	8.4284	4.01e-06
c1066045_g1_i3	DPOD1_RAT	8.36479	4.92e-06
c1091174_g4_i4	LIN1_NYCCO	-9.24464	4.92e-06
c1079168_g1_i1	POL2_MOUSE	-8.39867	4.92e-06
c1080282_g1_i3	OSBL5_HUMAN	8.41554	5.43e-06
c1089852_g4_i6	ADCY2_HUMAN	8.24034	6.72e-06
c1065086_g1_i1	SPAG1_HUMAN	-8.76634	6.86e-06
c1088974_g4_i1	DSEL_HUMAN	-8.52665	6.87e-06
c1046138_g1_i1	Y8359_DICDI	-3.26088	7.83e-06
c1082570_g3_i2	CCNL2_HUMAN	8.27453	8.83e-06
c1075167_g1_i4	MOT2_HUMAN	-8.28711	9.45e-06
c1089216_g3_i4	SBNO2_BOVIN	9.00164	1.08e-05
c1068424_g1_i4	EP15R_HUMAN	8.61085	1.14e-05
c1077195_g2_i9	KC1A_XENLA	8.16067	1.3e-05
c1067524_g1_i2	TNKS2_HUMAN	8.3241	1.3e-05
c1090731_g2_i1	SHC1_XENLA	8.6358	1.3e-05
c1081414_g1_i1	RB11A_RAT	8.13259	1.39e-05
c1087547_g1_i1	DDR1_HUMAN	8.12621	1.5e-05
c1083389_g1_i4	KLH11_MOUSE	6.35467	1.59e-05
c1082905_g1_i4	PAR1_XENLA	8.27293	1.62e-05
c1082925_g1_i6	S43A3_HUMAN	-8.2269	1.63e-05
c1070268_g1_i4	ZC3HF_HUMAN	-6.14529	1.72e-05
c1078260_g1_i5	PSS_HELPY	-8.54066	2.2e-05
c1086010_g2_i2	RAB4B_DANRE	8.22584	2.33e-05
c1087417_g3_i1	IGF1R_HUMAN	8.49642	2.71e-05
c1083067_g2_i1	CTR3_HUMAN	7.9297	2.72e-05
c1074527_g1_i5	EXOC3_MOUSE	7.97274	2.75e-05
c1071883_g2_i2	ITCH_MOUSE	8.01211	2.75e-05
c1069151_g3_i1	MTMR5_MOUSE	8.62794	3.2e-05
c1065062_g2_i2	S39AB_HUMAN	8.19453	3.26e-05
c1086079_g1_i3	OBRG_RAT	8.10255	3.36e-05
c1091771_g2_i1	LPIN2_HUMAN	8.20397	3.39e-05
c1088042_g1_i3	MMP13_XENLA	8.43232	3.66e-05
c1082633_g1_i2	LCAP_HUMAN	7.87133	3.8e-05
c1081108_g2_i7	DDX5_PANTR	7.89109	4.6e-05
c1055766_g1_i1	SEC13_BOVIN	8.52415	6.15e-05
c1078442_g1_i2	LMCD1_HUMAN	7.98759	6.31e-05
c1092570_g1_i1	HBA_TARGR	-2.79501	6.31e-05
c1080139_g3_i3	LIPA1_HUMAN	8.10592	6.31e-05
c1078109_g9_i1	MEX3A_HUMAN	8.26807	7.18e-05
c1055916_g2_i2	IKBZ_HUMAN	7.77974	9.45e-05
c1078671_g2_i2	ALDOC_MACFA	8.52124	9.47e-05
c1089493_g4_i2	ACK1_BOVIN	7.65274	9.78e-05
c1077442_g1_i5	LYST_HUMAN	8.60627	9.96e-05
c1083480_g1_i4	RGPA2_HUMAN	-8.00686	0.000101
c1080217_g1_i4	F172B_HUMAN	7.87717	0.000104099
c1061180_g1_i2	IDE_BOVIN	7.67355	0.000104099
c1060498_g3_i1	NSL1_HUMAN	-7.72068	0.000104099
c1084240_g1_i4	S35B2_HUMAN	7.6455	0.000105373
c1086935_g5_i1	SV422_XENLA	-8.63903	0.000108966
c1092563_g1_i3	YRD6_CAEEL	8.22551	0.000126173
c1048841_g2_i1	LATS1_HUMAN	7.99739	0.000129076
c1077756_g2_i7	PB1_HUMAN	7.28907	0.000159256
c1080236_g3_i1	UBP4_HUMAN	7.79292	0.000159256
c1089887_g2_i7	CJ012_HUMAN	-8.16042	0.000159256
c1089781_g1_i1	SPTC3_HUMAN	5.25752	0.000163181
c1088438_g6_i2	DBF4B_HUMAN	8.02808	0.000169023
c1089051_g1_i2	FUS_MOUSE	8.05306	0.000171054
c1077796_g2_i2	CUL1_PONAB	-8.54748	0.000175025
c1089919_g4_i6	CP27B_HUMAN	5.65582	0.000179832
c1085398_g1_i3	THEM4_XENLA	8.34304	0.000187545
c1081108_g2_i8	DDX5_MACFA	8.2649	0.000201884
c1089782_g7_i1	PPARD_CANFA	7.78238	0.000203002
c1088063_g1_i2	RTJK_DROME	8.28745	0.00021605
c1077943_g7_i1	NCOAT_HUMAN	7.45788	0.000251284
c1073023_g3_i1	2A5E_HUMAN	8.03332	0.000280192
c1088647_g1_i3	CAMP2_HUMAN	7.81027	0.00030595
c1088902_g3_i1	LIN1_NYCCO	-8.14373	0.000319549
c1090534_g5_i2	ANR50_HUMAN	8.00737	0.000327285
c1087639_g3_i1	SNX25_HUMAN	7.78133	0.000327285
c1081183_g1_i1	SYRC_BOVIN	-8.08436	0.000338457
c1089348_g4_i3	KCC1A_RAT	7.54283	0.000366421
c1083426_g7_i1	PRS35_MACMU	-7.92267	0.00037533
c1085289_g4_i3	TRI39_RAT	8.01462	0.000393626
c1087211_g2_i3	MARF1_CHICK	8.42293	0.000395116
c1073562_g2_i1	OSBL7_HUMAN	5.33541	0.000404568
c1077195_g2_i1	KC1A_XENLA	7.3388	0.000414958
c1084191_g3_i2	SMBT2_HUMAN	7.2839	0.00058118
c1046138_g1_i2	GTAN_DICDI	-3.03594	0.000708374
c1086426_g1_i2	PO2F1_XENTR	-7.38591	0.000710994
c1079384_g6_i2	SPTN1_HUMAN	-8.7218	0.000714907
c1084867_g1_i4	TXND5_MOUSE	7.95313	0.000717046
c1085169_g1_i2	SNX4_PONAB	-7.403	0.000743329
c1040031_g1_i3	RIF1_HUMAN	-7.62047	0.000743329
c1092247_g1_i1	CYR1A_XENLA	7.22975	0.000743329
c1086638_g3_i3	SYNE1_HUMAN	7.28535	0.000751014
c1076988_g2_i2	CSPP1_HUMAN	7.41799	0.000825231
c1085783_g2_i3	WASH1_CHICK	7.40555	0.000855817
c1087294_g1_i3	DCTN1_XENLA	7.30974	0.000881298
c1079011_g3_i4	DC1L2_HUMAN	2.38564	0.00090867
c1086962_g2_i1	KLH21_XENLA	7.73583	0.00091059
c1083709_g3_i3	EFNB2_HUMAN	7.53043	0.000953478
c1084146_g3_i3	MIER3_MACFA	4.44932	0.00107029
c1070069_g2_i4	TEAD3_HUMAN	6.10165	0.00113161
c1084101_g1_i3	TB182_MOUSE	7.44077	0.00113543
c1083438_g1_i4	IVD_HUMAN	7.56606	0.00114558
c1083298_g6_i4	SOSB1_HUMAN	7.34888	0.00117966
c1086426_g1_i3	PO2F1_XENLA	8.5658	0.00121484
c1083128_g3_i8	PDE3B_MOUSE	7.22609	0.00128941
c1062574_g1_i2	GBA2_HUMAN	-5.34054	0.0013378
c1075298_g7_i1	B3A2_HUMAN	7.39614	0.0013378
c1074518_g1_i2	NFAC3_MOUSE	7.467	0.00136072
c1062446_g1_i1	COQ5_HUMAN	7.13015	0.00136483
c1070846_g1_i2	AFAP1_CHICK	7.23185	0.00141655
c1063599_g1_i2	SLAIL_XENTR	7.21421	0.00141655
c1075866_g1_i6	MCF2L_HUMAN	7.34491	0.00141655
c1065280_g2_i2	VANG2_XENTR	8.2822	0.00143202
c1066351_g1_i4	BPI_BOVIN	-7.48241	0.00143284
c1082973_g4_i4	H33_XENTR	-7.4389	0.00143705
c1088088_g1_i5	RPOM_MOUSE	7.10275	0.00146174
c1051120_g2_i3	TTLL4_HUMAN	7.12484	0.00151571
c1089250_g4_i2	UGPA_HUMAN	7.67994	0.00155498
c1082024_g4_i6	SPT6H_HUMAN	7.33029	0.00164856
c1069877_g6_i2	APLD1_RAT	7.32672	0.00167418
c1078951_g9_i7	SEM6A_HUMAN	7.0587	0.00170366
c1087810_g1_i3	DOT1L_HUMAN	7.04176	0.00176983
c1081069_g1_i1	FOXP4_HUMAN	5.99604	0.00176983
c1070736_g1_i1	RTF21_SCHPO	7.52279	0.00180777
c1091706_g1_i1	JCAD_HUMAN	4.44198	0.00190579
c1086935_g5_i3	SV422_XENLA	4.77363	0.00194337
c1086449_g5_i1	RS5_HUMAN	-3.48157	0.00198572
c1069986_g2_i1	CK095_HUMAN	7.15479	0.0020379
c1091277_g1_i5	LIN1_NYCCO	2.81584	0.00204645
c1077767_g7_i2	ZN510_HUMAN	7.09634	0.0020642
c1080633_g8_i1	FTSJ1_HUMAN	7.07008	0.00212822
c1086080_g1_i4	STEA4_HUMAN	7.3448	0.00212822
c1091089_g1_i1	TPTE2_HUMAN	5.16548	0.0021462
c1079867_g8_i2	TM41B_CHICK	7.79281	0.0021462
c1060166_g1_i1	CBY1_BOVIN	7.14958	0.0021462
c1078015_g1_i3	SRBP2_HUMAN	2.48663	0.0021462
c1086359_g4_i3	RIHA_SALG2	-6.82606	0.0021462
c1070215_g1_i2	HAUS5_MOUSE	7.18328	0.0021462
c1076511_g3_i1	DPEP2_MOUSE	-7.78698	0.0021462
c1089533_g3_i1	CP1B1_HUMAN	4.0241	0.0021748
c1088978_g3_i7	DDX25_XENLA	-6.64971	0.0021748
c1070152_g5_i4	GCNFA_DANRE	-7.93471	0.00223304
c1070152_g5_i1	NR6A1_XENTR	7.25201	0.00223482
c1079330_g10_i6	SMC4_XENLA	7.39722	0.00226936
c1078208_g3_i11	AF17_HUMAN	7.36368	0.00260609
c1091541_g1_i1	EPHA7_CHICK	7.13085	0.00266234
c1089297_g2_i2	ALG9_HUMAN	7.00881	0.00269475
c1089616_g2_i2	CCSAP_HUMAN	7.6584	0.00271669
c1079348_g1_i5	CDCA7_HUMAN	-7.02697	0.00276148
c1082139_g3_i2	ZN536_MOUSE	7.33582	0.00287799
c1087046_g1_i2	APBB1_MOUSE	8.24057	0.00288635
c1090547_g2_i5	RS16_RAT	6.95217	0.00299826
c1068663_g2_i2	PTN14_HUMAN	6.88282	0.0030628
c1085979_g2_i4	XPO5_HUMAN	7.125	0.00309468
c1085239_g6_i3	PCD19_HUMAN	6.9178	0.0031001
c1092479_g3_i1	PARVB_HUMAN	7.10773	0.0031001
c1080646_g3_i1	I27RA_MOUSE	7.16873	0.00327126
c1091247_g5_i1	TFR2_HUMAN	-5.46135	0.00333279
c1074886_g4_i1	STXB1_RAT	2.66916	0.0033496
c1072501_g5_i3	REV1_CHICK	6.98807	0.0033496
c1054335_g2_i1	CTK2_XENLA	7.22648	0.00336238
c1086919_g6_i4	LIFR_CANFA	7.20589	0.00340587
c1680103_g1_i1	GP1_CHLRE	-6.03103	0.00340587
c1076392_g2_i1	S5A2_MACFA	2.16474	0.00342795
c1081290_g1_i7	IF4G3_HUMAN	7.06695	0.00354103
c1089316_g1_i5	KI26A_HUMAN	3.9419	0.00354727
c1080927_g1_i9	ARHG1_HUMAN	6.31787	0.00389178
c1072608_g3_i3	TGFB2_CHICK	5.17893	0.00420889
c1063697_g1_i2	CUL4B_HUMAN	6.98706	0.00421052
c1087085_g4_i2	LIN1_NYCCO	-6.7448	0.00421435
c1082680_g4_i2	FREM1_HUMAN	7.28397	0.00432208
c1076022_g3_i4	ACINU_HUMAN	-2.87434	0.00459779
c1086416_g6_i2	MITF_HUMAN	6.79027	0.00461784
c1088845_g6_i7	EKI1_HUMAN	6.78948	0.00464216
c1087547_g1_i3	DDR1_HUMAN	-6.30604	0.00470291
c1091468_g1_i3	RTJK_DROME	-7.20748	0.00470291
c1091343_g3_i1	PCD16_HUMAN	6.96933	0.00476718
c1077671_g7_i8	ZMYM2_HUMAN	6.90157	0.00494803
c1088042_g1_i4	MMP13_XENLA	2.9664	0.00496281
c1019762_g1_i1	WSDU1_HUMAN	6.8001	0.00558949
c1071058_g1_i2	T176B_HUMAN	6.78997	0.00595143
c1060489_g1_i1	SYTC2_XENTR	6.98424	0.00606193
c1081955_g3_i2	P2Y11_HUMAN	6.87809	0.00635847
c1085245_g1_i2	BTBD7_HUMAN	5.57738	0.00637694
c1082906_g1_i2	POL2_MOUSE	6.06863	0.00645677
c1084797_g8_i1	SDCB1_HUMAN	6.79156	0.00645677
c1065555_g1_i2	FAKD1_XENTR	6.79979	0.00666942
c1068527_g1_i4	UCKL1_MOUSE	7.12814	0.00675723
c1088042_g1_i2	MMP13_XENLA	3.28163	0.00693834
c1089493_g4_i9	ACK1_BOVIN	6.80832	0.00699564
c1070232_g1_i8	RGS3_HUMAN	-6.92213	0.00718193
c1086318_g1_i1	SOAT1_HUMAN	4.25569	0.00722434
c1055292_g1_i1	AP4B1_HUMAN	-7.81811	0.00738564
c1087155_g2_i2	CTR1_HUMAN	6.85857	0.00747495
c1075387_g2_i7	PHF10_HUMAN	-7.07672	0.00777551
c1078911_g2_i2	TRABD_MOUSE	7.22755	0.0078449
c1088831_g3_i1	LIN1_NYCCO	-1.79479	0.00789487
c1086762_g2_i5	PRDM1_MOUSE	3.3286	0.00799957
c1073401_g2_i9	TARSH_HUMAN	-3.55521	0.00818867
c1089695_g1_i6	ZN271_HUMAN	7.08303	0.00892726
c1085715_g3_i4	IQCE_HUMAN	7.29266	0.00903681
c1086594_g1_i1	ABCG4_HUMAN	7.02331	0.00958186
c1088877_g1_i4	FA13B_MOUSE	4.42899	0.00970295
c1079056_g3_i1	ADXL_XENLA	-7.13556	0.00989625
c1050053_g1_i1	UXS1_XENTR	-7.44199	0.00991621
c1077677_g2_i5	RU17_XENLA	-11.1845	0.0101354
c1067327_g1_i3	TRAC9_MAIZE	7.12872	0.0102412
c1078335_g6_i2	WBP1_HUMAN	-4.0453	0.0105268
c1074386_g5_i1	KDM4B_HUMAN	7.11784	0.0114039
c1083251_g3_i4	ARNT2_HUMAN	6.83273	0.0115404
c1064150_g2_i1	STAG1_MOUSE	6.64575	0.0119532
c1082821_g1_i3	WAP53_MOUSE	6.55626	0.0119532
c1077031_g3_i5	RTBS_DROME	6.83585	0.0129562
c1092148_g2_i2	FAT3_HUMAN	6.64614	0.0130116
c1091000_g1_i3	RAD17_HUMAN	6.91107	0.013016
c1034537_g1_i2	POL3_DROME	6.58936	0.013016
c1089376_g10_i3	CLC2D_HUMAN	2.66203	0.0130323
c1085239_g6_i4	PCD19_HUMAN	6.5942	0.0139247
c1069099_g1_i3	EPS8_HUMAN	6.59096	0.0141124
c1087698_g2_i1	LIN41_MOUSE	2.63109	0.0148519
c1081552_g1_i8	POL3_DROME	6.60944	0.0148776
c1090477_g1_i2	SSH1_HUMAN	6.64577	0.0153357
c1086244_g3_i6	TAOK3_CHICK	-7.89823	0.0156163
c1086859_g1_i4	EPHA2_HUMAN	3.84079	0.0157188
c1088560_g2_i5	GTR8_HUMAN	-4.31506	0.0157188
c1091906_g1_i2	MAST2_HUMAN	-6.52974	0.0159198
c1089075_g1_i5	VWA8_HUMAN	4.63855	0.0159221
c1069535_g2_i2	ARSG_CANFA	6.75766	0.016685
c1090313_g2_i1	CDK17_HUMAN	6.90314	0.016685
c1073595_g2_i4	ZC3H4_HUMAN	-7.30573	0.0170339
c1088962_g1_i2	ZNRF2_DANRE	6.4739	0.0173901
c1087726_g5_i1	CHSS3_HUMAN	1.49129	0.0180229
c1078605_g3_i2	BAG6_RAT	6.65716	0.0183722
c1056938_g1_i2	CDC45_XENLA	5.67734	0.0184977
c1072780_g1_i1	MET_OTOGA	-4.13186	0.0188154
c1080182_g3_i5	RL7_CHICK	10.458	0.0192563
c1090347_g1_i1	BRCA1_BOVIN	6.48005	0.019325
c1089459_g1_i2	PCM1_HUMAN	6.44846	0.019325
c1091116_g1_i6	BEND3_HUMAN	6.61617	0.019356
c1087702_g15_i9	K1967_HUMAN	7.00133	0.019621
c1084366_g6_i4	E2F7_HUMAN	7.72204	0.0207167
c1074992_g2_i3	MGAP_HUMAN	6.53163	0.021782
c1092108_g1_i3	PLOD3_MOUSE	2.1252	0.0218295
c1077859_g5_i5	CYLD_BOVIN	6.45706	0.0222484
c1072005_g6_i6	RASN_CHICK	4.71976	0.0222484
c1073808_g2_i2	FGFR1_PLEWA	6.60884	0.022739
c1091208_g2_i2	AP1B1_BOVIN	2.07911	0.0227465
c1088203_g6_i2	FAAH1_HUMAN	6.66863	0.0231744
c1045424_g1_i1	SNX8_HUMAN	6.41975	0.0232163
c1084851_g1_i5	RB27A_CANFA	4.56214	0.0232163
c1075955_g1_i2	FBX28_HUMAN	6.4253	0.0232163
c1085436_g1_i5	REXO1_MOUSE	7.05127	0.0233786
c1084268_g2_i2	CTTB2_HORSE	6.70568	0.0233786
c1088086_g1_i2	NEK9_HUMAN	4.93451	0.0234597
c1085527_g1_i5	STA13_HUMAN	-6.84346	0.0234597
c1085880_g6_i5	K2C8_XENLA	2.91123	0.0236306
c1072862_g8_i6	PK3CB_HUMAN	-6.71142	0.0236306
c1079348_g1_i3	CDCA7_HUMAN	4.51932	0.0238071
c1089911_g1_i3	STK40_CHICK	6.39923	0.0239917
c1086689_g7_i7	MADD_HUMAN	-7.65222	0.0240399
c1084473_g1_i2	A33_PLEWA	6.8903	0.0241129
c1074408_g1_i4	SELK_XENTR	6.41441	0.0241129
c1084711_g1_i9	POL2_MOUSE	4.91664	0.0248765
c1090567_g1_i2	HRPX_PLALO	-2.68614	0.0262772
c1090758_g5_i4	WDR82_CHICK	7.44851	0.0286991
c1082770_g3_i1	PLVAP_HUMAN	6.42108	0.0300781
c1079546_g3_i1	IGSF1_MOUSE	6.44953	0.0300781
c1077061_g1_i5	CHD4_MOUSE	7.39555	0.0301675
c1086690_g1_i1	CCD86_RAT	-7.2433	0.0304756
c1086839_g1_i3	NASP_RABIT	6.88441	0.0308862
c1091411_g4_i1	MUC5A_HUMAN	-2.84588	0.0315038
c1080778_g3_i3	CORA1_HUMAN	-6.96773	0.0316215
c1089359_g1_i2	RHGBA_HUMAN	5.77266	0.0321136
c1082680_g4_i3	FREM1_HUMAN	5.8917	0.0324877
c1081900_g1_i4	S100P_HUMAN	-1.99365	0.0332302
c1091703_g1_i9	ZFP91_HUMAN	6.65616	0.0349445
c1086296_g7_i2	CYTSB_HUMAN	5.74607	0.0355617
c1020875_g2_i1	HBB1_TRICR	-3.019	0.0355617
c1087511_g2_i2	RTJK_DROFU	-4.5542	0.0372422
c1073401_g3_i2	TARSH_HUMAN	-1.77685	0.0376355
c1063126_g1_i1	U88_HHV6U	-2.17223	0.0376355
c1076141_g3_i9	TNR6B_MOUSE	4.47614	0.0376355
c1079124_g2_i3	K0825_HUMAN	6.4289	0.0383675
c1082890_g2_i3	CHFR_MOUSE	4.52138	0.0397686
c1084583_g1_i5	KCC2D_RAT	4.59105	0.0408655
c1078833_g1_i1	INHBA_SHEEP	2.05496	0.0408655
c1085634_g3_i1	DYN2_MOUSE	1.70424	0.0410628
c1078675_g3_i1	RTJK_DROME	-6.59339	0.042105
c1076767_g9_i2	SWAHB_XENLA	5.12086	0.0427936
c1084404_g1_i1	PO22_POPJA	5.68598	0.0429912
c1083811_g1_i6	COBA2_BOVIN	6.21762	0.0436894
c1083953_g2_i1	FA48A_CHICK	6.19649	0.044022
c1078938_g1_i6	GID8_CHICK	4.64344	0.044022
c1089172_g2_i1	UTRO_HUMAN	-7.26852	0.044816
c1075401_g1_i5	CQ104_MOUSE	-7.54206	0.0449103
c1083150_g2_i3	CBX1_MOUSE	6.38233	0.0451184
c1086017_g4_i5	MPRI_HUMAN	1.94571	0.0471586
c1082351_g1_i5	POL2_MOUSE	6.55975	0.0482823
c1091849_g1_i4	HBA2_TRICR	-2.99519	0.0485541
