# Supplementary material for: Midkine is a dual regulator of wound epidermis development and inflammation during the initiation of limb regeneration
Source: eLife. 2020 Jan 14;9:e50765. doi: 10.7554/eLife.50765 (PMC6959999; doi:10.7554/eLife.50765)
Supplement: Supplementary file 2. — This excel table contains the list of differentially expressed transcripts in non-dividing cells in stump tissues in both conditions at 5 dpa. The respective fold change, blastx hit, and adjusted p-values are listed for each hit. [file elife-50765-supp2.xlsx]

## Sheet: Top_FSF_2N
transcript id	blastx hit	logFC	padj
c1092764_g1_i2	RTJK_DROFU	-5.53968	1.07e-21			Note: Positive fold change indicates enrichment in regenerating 2N, negative fold change indicates enrichment in FSF 2N
c1078994_g2_i6	CATK_RABIT	5.22402	1.23e-20
c1088639_g4_i1	RRT15_YEAST	-8.31897	3.08e-20
c1078994_g2_i3	CATK_HUMAN	4.59753	1.46e-19
c1680103_g1_i1	GP1_CHLRE	-6.47681	5.17e-18
c1082906_g1_i2	POL2_MOUSE	11.0024	6.48e-15
c1057214_g1_i1	SN_HUMAN	3.32015	2.91e-14
c1090300_g1_i1	CNN2_MOUSE	10.0003	5.73e-12
c1092690_g1_i4	SACS_MOUSE	3.43159	6.27e-12
c1082885_g1_i2	NSF_MOUSE	9.58265	1.86e-10
c1081515_g3_i1	WNK3_HUMAN	9.29256	4.09e-10
c1070626_g1_i3	ANO6_HUMAN	9.27254	4.11e-10
c1065747_g3_i2	KCRB_CHICK	2.21129	4.8e-10
c1086010_g2_i2	RAB4B_DANRE	9.42522	4.8e-10
c1092570_g1_i1	HBA_TARGR	-2.86146	7.58e-10
c1053472_g1_i1	GBP1_CHLAE	2.24271	8.03e-10
c1091277_g1_i5	LIN1_NYCCO	3.2349	1.76e-09
c1052471_g1_i1	ELP1_HUMAN	8.99327	1.76e-09
c1072152_g3_i2	HERC3_HUMAN	5.89103	2.18e-09
c1078351_g1_i1	TP53B_HUMAN	5.7223	3.28e-09
c1086318_g1_i3	SOAT1_HUMAN	9.22665	3.36e-09
c1084683_g5_i2	N42L2_HUMAN	8.99296	4.67e-09
c1090167_g1_i3	S38A3_HUMAN	8.923	4.88e-09
c1088436_g1_i3	BPHL_MOUSE	-2.50941	6.42e-09
c1079951_g1_i3	CL16A_HUMAN	9.06497	6.6e-09
c1082738_g2_i2	IF2_KINRD	-5.60134	7.84e-09
c1076922_g10_i1	PXDN_HUMAN	9.02437	8.91e-09
c1086644_g3_i11	CNOT1_HUMAN	8.91495	9.34e-09
c1088054_g3_i1	LAMB2_HUMAN	-8.74376	1.68e-08
c1082693_g1_i3	PTPRE_HUMAN	9.12624	1.7e-08
c1072251_g4_i1	NGAP_HUMAN	8.41866	2.3e-08
c1078580_g2_i2	TT39A_XENTR	2.33194	2.36e-08
c1077756_g2_i6	PB1_HUMAN	8.5697	2.72e-08
c1089216_g3_i4	SBNO2_BOVIN	8.98352	2.72e-08
c1086263_g1_i1	LEMD2_MOUSE	8.69677	4.56e-08
c1052471_g1_i3	ELP1_HUMAN	-8.59963	5.26e-08
c1089211_g9_i2	NDUS1_HUMAN	8.48713	5.39e-08
c1085700_g1_i4	F107B_HUMAN	8.50313	8.2e-08
c1085723_g3_i4	VATA_HUMAN	8.47974	8.78e-08
c1075582_g1_i1	NU155_HUMAN	8.53962	1.45e-07
c1086079_g1_i3	OBRG_RAT	5.7127	1.57e-07
c1085524_g4_i1	SPTB2_HUMAN	-8.5757	1.57e-07
c1088042_g1_i2	MMP13_XENLA	3.84904	1.74e-07
c1085700_g1_i1	F107B_HUMAN	-8.48019	1.74e-07
c1088299_g3_i11	HNRPU_HUMAN	8.35027	1.75e-07
c1089084_g5_i1	TRHY_HUMAN	3.10661	1.84e-07
c1090758_g5_i4	WDR82_CHICK	8.24055	1.91e-07
c1064056_g1_i1	GP350_EBVB9	-8.41432	2.56e-07
c1089084_g4_i1	PAR14_MOUSE	3.35796	2.58e-07
c1090897_g2_i5	POLG_PVCV2	8.28023	3.03e-07
c1081415_g2_i1	HERC5_HUMAN	2.71938	3.14e-07
c1086799_g1_i3	SPT2_XENTR	8.399	3.3e-07
c1597296_g1_i1	POLY_DROME	3.28795	3.31e-07
c1042145_g2_i2	UBL7_MOUSE	-8.31723	3.57e-07
c1085065_g1_i1	SETX_HUMAN	-7.60707	3.9e-07
c1081540_g4_i1	SPX2_XENLA	1.91883	4.16e-07
c1084184_g1_i4	GMPBA_XENLA	8.35633	4.17e-07
c1083484_g4_i1	SYWC_PONAB	-6.42792	4.28e-07
c1082127_g2_i4	HERC1_HUMAN	8.14495	4.65e-07
c1089402_g2_i3	IRF3_CHICK	3.46706	4.87e-07
c1084654_g3_i1	2AAA_PIG	8.33089	5.35e-07
c1090770_g1_i3	HARB1_HUMAN	-4.68496	6.5e-07
c1085660_g2_i4	RXRBA_DANRE	8.58689	6.54e-07
c1084500_g2_i5	PRAM_HUMAN	8.36195	6.59e-07
c1084053_g1_i4	LRRK1_HUMAN	8.20571	7.06e-07
c1090476_g2_i1	HCDH_PIG	8.05205	8.2e-07
c979896_g1_i1	043R_FRG3G	-8.6935	8.45e-07
c1052055_g2_i1	RTJK_DROME	2.66202	8.85e-07
c1085660_g2_i5	RXRBA_DANRE	7.17347	8.85e-07
c1080270_g3_i4	ZBT46_HUMAN	8.59039	9.17e-07
c1078218_g3_i2	H4_XENTR	-4.22053	9.25e-07
c1089828_g2_i1	SMTN_HUMAN	6.23451	9.25e-07
c1071943_g2_i1	MX1_MACMU	8.21512	9.3e-07
c1091771_g2_i3	LPIN2_HUMAN	7.83175	9.54e-07
c1092844_g1_i2	RTBS_DROME	-2.10278	1.03e-06
c1082664_g1_i4	ZO1_CANFA	8.39234	1.12e-06
c1071771_g2_i1	IL11_HUMAN	2.91933	1.13e-06
c1082749_g2_i5	RHG23_MOUSE	-8.09896	1.23e-06
c1085800_g1_i3	FA96A_HUMAN	7.955	1.33e-06
c1081560_g1_i1	EPDR1_MACFA	6.00842	1.59e-06
c1064539_g2_i1	CCD93_CHICK	8.03794	1.65e-06
c1042145_g2_i1	UBL7_MOUSE	7.86253	1.65e-06
c1085431_g1_i4	DOCK9_HUMAN	6.38268	1.75e-06
c1090666_g1_i1	PLEC_MOUSE	7.85756	1.87e-06
c1089338_g4_i2	ST38L_HUMAN	7.98702	2.35e-06
c1075965_g1_i3	GPR17_HUMAN	8.02984	2.47e-06
c1081290_g1_i4	IF4G3_HUMAN	-8.40237	2.55e-06
c1072497_g2_i2	DEFI8_HUMAN	8.01286	2.69e-06
c1084774_g1_i3	SEPT7_XENLA	7.95713	2.69e-06
c1067485_g1_i1	HARB1_HUMAN	-2.30422	2.85e-06
c1082633_g1_i2	LCAP_HUMAN	7.53955	2.86e-06
c1063882_g2_i1	MAST3_XENLA	7.96745	2.87e-06
c1078350_g2_i1	SC31A_HUMAN	8.17247	2.89e-06
c1086389_g2_i1	ARF1_RAT	7.83632	3.59e-06
c1061972_g1_i1	ACTZ_RAT	7.88689	3.83e-06
c1084682_g4_i3	ZN326_PONAB	7.7245	3.94e-06
c1087610_g1_i1	DIA1_HUMAN	8.07149	4.35e-06
c1073648_g4_i6	UBP2L_MOUSE	7.9469	4.35e-06
c1085800_g1_i1	FA96A_HUMAN	-8.06291	4.64e-06
c1052724_g1_i2	CDK12_RAT	-7.80682	4.69e-06
c1081285_g5_i5	GTF2I_RAT	7.887	4.72e-06
c1083671_g1_i1	RTBS_DROME	2.77319	4.76e-06
c1083853_g3_i4	MIDNB_XENLA	7.90864	4.77e-06
c1090154_g1_i4	HARB1_DANRE	-2.75735	5.08e-06
c1067760_g1_i1	GAS6_RAT	1.88237	5.24e-06
c1086595_g7_i1	SFSWA_HUMAN	4.5182	5.72e-06
c1089084_g3_i2	PAR14_MOUSE	3.47746	6.66e-06
c1064679_g1_i4	F125B_HUMAN	7.66305	6.75e-06
c1092764_g1_i1	RTJK_DROFU	-8.00764	6.91e-06
c1090084_g2_i2	TRAF1_HUMAN	-7.71548	7.05e-06
c1074774_g1_i2	SHKB1_BOVIN	6.90826	7.13e-06
c1086188_g2_i1	GP1BB_MOUSE	-2.55325	8.79e-06
c1078848_g4_i2	ICAL_HUMAN	2.03544	9.81e-06
c1064539_g2_i4	CCD93_CHICK	-7.30836	9.86e-06
c1087476_g1_i3	MUC5A_HUMAN	-7.68673	1.01e-05
c1092844_g1_i3	RTBS_DROME	-2.11467	1.01e-05
c1062358_g2_i1	LYL1_HUMAN	7.5476	1.07e-05
c1082570_g3_i2	CCNL2_HUMAN	7.745	1.12e-05
c1079493_g2_i5	MICA3_HUMAN	-7.92429	1.14e-05
c1084953_g1_i1	SHRM4_HUMAN	4.95892	1.15e-05
c1090123_g1_i2	SIA8D_PANTR	4.05142	1.15e-05
c1079080_g2_i2	TRADD_BOVIN	7.607	1.15e-05
c1086762_g2_i1	PRDM1_HUMAN	2.13099	1.17e-05
c1070684_g6_i4	TM100_BOVIN	-7.77076	1.22e-05
c1086278_g2_i3	BDP1_HUMAN	7.47504	1.26e-05
c1085740_g2_i2	CXA1_CHLAE	7.57177	1.3e-05
c1075713_g5_i3	IL5RA_MOUSE	7.5502	1.49e-05
c1079618_g2_i4	DNM1L_BOVIN	7.70841	1.49e-05
c1070014_g7_i3	RANB3_MACFA	4.64307	1.54e-05
c1080632_g5_i4	VMA5A_HUMAN	7.62603	1.55e-05
c1086026_g1_i3	SPTN5_HUMAN	-7.7614	1.55e-05
c1086668_g1_i3	SPAT7_HUMAN	7.62208	1.55e-05
c1065256_g2_i2	SEM4D_HUMAN	1.47777	1.58e-05
c1086085_g1_i1	YD019_HUMAN	-2.60971	1.59e-05
c1069495_g6_i1	SIAT2_CHICK	2.31131	1.68e-05
c1078381_g8_i1	WEE1_HUMAN	-7.52402	1.68e-05
c1079985_g4_i3	GFPT1_RAT	7.53147	1.73e-05
c1088917_g3_i2	ASAP3_HUMAN	-7.55596	1.87e-05
c1085180_g5_i5	ZFHX4_CHICK	-3.50489	1.88e-05
c1091340_g1_i3	K0317_MOUSE	7.49154	1.88e-05
c1086786_g1_i1	STRN3_BOVIN	-7.54967	2.01e-05
c1090634_g2_i6	S38AA_PONAB	-7.93021	2.01e-05
c1085907_g1_i1	RTBS_DROME	8.07296	2.08e-05
c1083369_g1_i2	SMAD4_HUMAN	-8.10664	2.08e-05
c1077954_g1_i3	RM10_RAT	7.50578	2.09e-05
c1069651_g8_i1	YD019_HUMAN	-3.68834	2.09e-05
c1083454_g6_i2	ZBTB3_HUMAN	7.90848	2.09e-05
c1073890_g1_i5	TF2H1_HUMAN	7.41559	2.09e-05
c1089084_g1_i1	MYBX_DICDI	2.82543	2.16e-05
c1026844_g2_i1	HXK1_HUMAN	1.97412	2.18e-05
c1084103_g6_i1	IQCA1_HUMAN	-4.61824	2.22e-05
c1090970_g3_i1	CC032_HUMAN	1.21469	2.27e-05
c1079689_g1_i3	MA2C1_HUMAN	7.392	2.35e-05
c1089828_g2_i4	SMTN_HUMAN	-7.45085	2.57e-05
c1089051_g1_i4	FUS_MOUSE	2.31711	2.59e-05
c1083302_g7_i1	DCNL3_XENTR	7.8033	2.59e-05
c1076443_g4_i3	RN214_HUMAN	7.54387	2.62e-05
c1078148_g2_i1	PAR14_MOUSE	2.14722	2.64e-05
c1082749_g2_i3	RHG23_MOUSE	7.57028	2.72e-05
c1090656_g1_i2	LG3BP_HUMAN	1.64597	2.72e-05
c1087904_g2_i2	ZN142_HUMAN	-7.54381	2.76e-05
c1087631_g4_i2	YS027_HUMAN	8.19767	2.79e-05
c1075176_g1_i2	HTR5B_HUMAN	2.13224	2.88e-05
c1086136_g3_i3	MO2R1_MOUSE	7.33687	2.92e-05
c1081710_g1_i2	HARB1_BOVIN	-2.60887	3.1e-05
c1082450_g3_i2	CRLD1_HUMAN	-7.51973	3.11e-05
c1089733_g2_i4	RUFY3_HUMAN	7.56936	3.12e-05
c1070934_g2_i2	PSIP1_CHICK	7.54913	3.31e-05
c1081960_g1_i4	RBM47_PONAB	4.32324	3.53e-05
c1063867_g2_i1	SZRD1_BOVIN	7.56865	3.74e-05
c1065114_g2_i5	PDE7A_HUMAN	7.27104	3.84e-05
c1091262_g3_i1	GPSM1_MOUSE	7.3184	3.97e-05
c1064319_g1_i1	ACTN4_BOVIN	7.30723	3.99e-05
c1058608_g2_i2	ING3_CHICK	2.30318	4.04e-05
c1081183_g1_i1	SYRC_BOVIN	-7.86769	4.13e-05
c1062919_g1_i4	OXND1_XENLA	7.31184	4.13e-05
c1091536_g1_i6	ZN552_HUMAN	-1.72112	4.28e-05
c1090084_g2_i1	TRAF2_MOUSE	4.89877	4.31e-05
c1080439_g1_i3	RN19B_MOUSE	7.5546	4.79e-05
c1092686_g1_i3	RSBN1_HUMAN	1.56268	4.97e-05
c1081080_g1_i1	MDM4_BOVIN	-7.40618	4.99e-05
c1070069_g2_i4	TEAD3_HUMAN	7.47705	5.1e-05
c1083601_g1_i5	S4A11_HUMAN	7.25686	5.49e-05
c1081534_g4_i1	TUT4_HUMAN	7.32563	5.52e-05
c1091954_g6_i1	RNPS1_RAT	-7.36647	5.67e-05
c1079689_g1_i2	MA2C1_HUMAN	-7.31835	5.67e-05
c1081253_g1_i2	RPC5_MOUSE	7.65712	5.68e-05
c1067279_g4_i1	GRN_HUMAN	1.6734	5.86e-05
c1041958_g1_i2	LIN1_NYCCO	-7.34084	5.93e-05
c1015640_g1_i1	BIN2_RAT	7.32024	6.04e-05
c1063065_g1_i3	RNF41_PONAB	7.21627	6.05e-05
c1092690_g1_i2	SACS_MOUSE	2.36627	6.45e-05
c1053165_g1_i1	CP3A5_HUMAN	7.21417	6.47e-05
c1090700_g2_i1	LIN1_NYCCO	1.67561	6.47e-05
c1055988_g4_i1	E41L2_HUMAN	7.31779	6.86e-05
c1072809_g5_i4	NCKP5_HUMAN	-7.36234	6.95e-05
c1084851_g1_i5	RB27A_CANFA	5.62529	6.96e-05
c1070849_g3_i5	GSCR1_HUMAN	7.18546	7.03e-05
c1608591_g1_i1	YRD6_CAEEL	4.47142	7.15e-05
c1085804_g2_i1	LRP12_HUMAN	7.35999	7.28e-05
c1060473_g2_i1	MILK2_HUMAN	-1.58205	7.41e-05
c1089295_g1_i2	GCC2_HUMAN	7.36086	7.61e-05
c1087336_g1_i3	APMAP_CHICK	7.19296	7.85e-05
c1086416_g6_i3	MITF_HUMAN	7.2667	8.13e-05
c1088893_g1_i7	RTF23_SCHPO	-7.33826	8.31e-05
c1084308_g2_i1	DOHH_XENLA	7.21165	8.59e-05
c1085757_g1_i1	IF4G2_MOUSE	1.76525	8.63e-05
c819382_g1_i1	LIN1_NYCCO	3.40744	8.66e-05
c1067148_g1_i4	GCP2_MOUSE	7.22973	8.67e-05
c1086639_g1_i1	K226L_BOVIN	7.18587	8.99e-05
c1073890_g1_i1	TF2H1_HUMAN	-7.25461	9.16e-05
c1076447_g5_i1	CP013_XENTR	7.14275	9.79e-05
c1082973_g4_i4	H33_XENTR	-7.23592	9.93e-05
c1083836_g2_i4	CATK_PIG	1.41126	0.000108685
c931507_g1_i1	CXL10_BOVIN	2.06482	0.000110966
c1086384_g12_i1	IE2_HHV6Z	1.80582	0.000113783
c1086252_g8_i4	TAOK2_XENLA	-7.34678	0.000116461
c1075713_g5_i1	IL5RA_MOUSE	-7.17719	0.000119739
c1068991_g5_i1	VAS1_BOVIN	1.20714	0.000120413
c1086134_g3_i1	SMYD3_MOUSE	2.67946	0.000120413
c1087429_g4_i2	NRP2_MOUSE	1.50936	0.000124288
c1090048_g1_i4	ASPH_HUMAN	7.10723	0.000126158
c1072876_g4_i10	RBM25_HUMAN	7.4952	0.000127976
c1087180_g5_i5	AKAP2_HUMAN	7.52104	0.00012952
c1092686_g1_i2	RSBN1_HUMAN	2.54464	0.00013795
c1067485_g1_i3	HARB1_HUMAN	-2.53587	0.000140064
c1087101_g1_i3	ILVBL_DANRE	7.09958	0.000142121
c1070794_g1_i1	HS3S1_MOUSE	-2.43974	0.000142239
c1064348_g7_i1	FBN2_HUMAN	1.74469	0.000148724
c1088560_g2_i5	GTR8_HUMAN	-4.32285	0.00015091
c1089602_g1_i3	POL_WDSV	4.8246	0.000152134
c1053879_g1_i1	PRP1_ARATH	-6.93872	0.00015693
c1068144_g3_i2	DDX1_HUMAN	1.71574	0.000160768
c1077802_g1_i2	DGLA_HUMAN	7.07332	0.000174271
c1066961_g2_i3	SACS_HUMAN	-7.62955	0.000184258
c1090476_g2_i2	HCDH_PIG	-7.24176	0.000184258
c1079664_g3_i5	ZNFX1_HUMAN	2.48155	0.000184258
c1069139_g1_i7	F122A_CHICK	-2.71415	0.000184258
c1086278_g2_i4	BDP1_HUMAN	7.10272	0.000191232
c1077789_g1_i6	RTN3_HUMAN	5.20745	0.000191232
c1043226_g1_i2	DPOD2_BOVIN	7.46123	0.000192654
c1085262_g1_i1	MYPOP_MOUSE	-2.46505	0.000193327
c1074988_g2_i1	SP1_HUMAN	-7.43605	0.000198493
c1080312_g4_i1	PRGC1_PIG	2.15257	0.000201125
c1078994_g2_i4	CATK_MOUSE	7.09144	0.000201125
c1076443_g4_i1	RN214_HUMAN	-6.66966	0.000204649
c1077431_g5_i4	MYD88_XENTR	6.93746	0.000209477
c1090656_g1_i1	LG3BP_HUMAN	1.94901	0.000213089
c1078218_g2_i1	H3_URECA	-7.40939	0.000219236
c1091411_g4_i1	MUC5A_HUMAN	-2.62982	0.00021934
c1066483_g1_i1	CHSTB_HUMAN	7.00436	0.000228037
c1070338_g1_i2	HARB1_HUMAN	-2.22604	0.000228585
c1090968_g4_i4	UCKL1_HUMAN	7.03782	0.000238168
c1070355_g3_i6	OGFR_HUMAN	1.61503	0.000240668
c1071825_g1_i2	SPS2_HUMAN	4.04412	0.000250228
c1089376_g10_i3	CLC2D_HUMAN	2.72846	0.000260734
c1091309_g2_i1	LIN1_NYCCO	-10.0155	0.000262286
c1086097_g1_i4	G6PI_MOUSE	1.21615	0.000272946
c1085557_g2_i8	GNDS_HUMAN	7.13502	0.000282315
c973538_g5_i1	MPEG1_BOVIN	1.47572	0.000292443
c1088530_g5_i14	WNK1_HUMAN	6.99072	0.00029352
c1076902_g1_i9	TAU_PONPY	-3.19386	0.000297281
c1079493_g2_i3	MICA3_HUMAN	6.85378	0.000298919
c1084736_g4_i3	MKLN1_HUMAN	6.87549	0.000303971
c1073964_g1_i2	RND3_RAT	1.90342	0.000306331
c1064078_g1_i2	AP4E1_HUMAN	-7.11515	0.000319315
c1078917_g3_i5	TSP2_CHICK	2.41741	0.000326581
c1079546_g4_i2	PRDX5_MOUSE	7.20034	0.000326761
c1079546_g4_i5	PRDX5_MOUSE	7.20034	0.000326761
c1070849_g3_i7	GSCR1_HUMAN	4.37795	0.000336922
c1065190_g1_i1	BT1A1_BOVIN	6.92577	0.000337948
c1074455_g2_i1	PTN22_HUMAN	1.32862	0.000342356
c1082821_g1_i3	WAP53_MOUSE	7.05022	0.000344151
c1084683_g5_i9	N42L2_MOUSE	-1.60708	0.000355925
c1080545_g1_i3	ODPB_BOVIN	2.86673	0.000356621
c1070371_g1_i2	GDS1_HUMAN	6.96165	0.00035671
c1079812_g15_i2	CSPG2_CHICK	2.07117	0.0003576
c1065306_g2_i1	MMP2_CHICK	2.14357	0.000357698
c1069371_g1_i4	DCTN3_BOVIN	-7.17963	0.000367524
c1090835_g1_i2	RS9_RAT	1.73533	0.000368557
c1089711_g1_i1	TMED8_MOUSE	7.03333	0.000376832
c1087486_g2_i9	SAM9L_HUMAN	2.59791	0.000380032
c1089076_g2_i1	LPAR4_MOUSE	2.9335	0.000388974
c1080998_g1_i1	SAP_HUMAN	1.11371	0.000393345
c1089376_g10_i5	CLC2D_HUMAN	1.6518	0.000396097
c875395_g1_i1	POL2_MOUSE	2.3852	0.000408493
c1084177_g2_i7	TDIF2_BOVIN	6.81731	0.000410407
c1080733_g1_i1	CHST2_HUMAN	2.17584	0.000412228
c1087734_g1_i2	CPVL_HUMAN	6.83075	0.000412228
c1091849_g1_i4	HBA2_TRICR	-2.50167	0.000424527
c1082824_g3_i1	ITA6_CHICK	7.05566	0.00042727
c1085939_g2_i2	SHRM1_XENLA	6.78813	0.000432186
c1086864_g5_i1	RTF21_SCHPO	-1.72201	0.000432732
c1079785_g1_i4	ZN462_HUMAN	6.80978	0.000456321
c1077383_g1_i1	CN37_PONAB	1.47521	0.00045731
c1087902_g1_i3	HGFL_HUMAN	1.50724	0.000462326
c1083652_g1_i1	PANK3_BOVIN	-6.93288	0.000481585
c1076556_g2_i3	AXNR_XENLA	6.851	0.000482906
c1073891_g8_i2	TGFA1_HUMAN	5.52355	0.000482906
c1068150_g2_i1	RHG12_HUMAN	6.93249	0.000502467
c1088831_g3_i1	LIN1_NYCCO	-1.40052	0.000521761
c1090524_g1_i9	BAZ2A_XENLA	-6.97212	0.000540095
c1091674_g2_i7	HARB1_DANRE	-1.9141	0.000541995
c1036789_g5_i3	PRS6B_RAT	-6.94585	0.000547282
c1036789_g5_i2	PRS6B_RAT	6.8733	0.000558534
c1091144_g1_i1	MYPOP_MOUSE	-1.91151	0.000591961
c1087820_g3_i1	ARAP3_HUMAN	1.43276	0.000593522
c1079286_g1_i2	PDC6I_RAT	6.96259	0.000596437
c1075918_g14_i2	FBN2_MOUSE	2.17032	0.000596437
c1080219_g2_i2	ZN827_HUMAN	4.44593	0.000601755
c1091100_g2_i2	FINC_PLEWA	1.15539	0.000607819
c1079011_g3_i4	DC1L2_HUMAN	1.89384	0.000611154
c1089023_g1_i2	TF3C3_HUMAN	6.87329	0.000615493
c1085715_g3_i5	IQCE_HUMAN	6.84097	0.000622064
c1090732_g6_i5	KLHL5_HUMAN	5.72636	0.000630821
c1083836_g4_i1	CATK_PIG	2.85467	0.000634144
c1090364_g1_i2	KBRS1_MACFA	1.96043	0.000637829
c1067904_g1_i3	HARB1_HUMAN	-1.67745	0.000650709
c1084905_g1_i1	FGL1_HUMAN	-6.98974	0.000673951
c1083836_g2_i3	CATK_PIG	2.7115	0.000675724
c1084751_g1_i4	FA49A_CHICK	9.10036	0.000680597
c1083026_g8_i1	ANGL7_HUMAN	1.40645	0.000699314
c1080929_g1_i2	KCNQ1_MOUSE	-5.27562	0.0007128
c1074396_g1_i1	ZN502_HUMAN	6.68718	0.000713067
c1083727_g1_i1	HEM0_MOUSE	-2.0542	0.000726362
c958550_g1_i1	YD019_HUMAN	-7.27785	0.00074786
c1077266_g6_i1	SMYD3_MOUSE	2.17428	0.000772156
c1086919_g6_i4	LIFR_CANFA	6.73881	0.000783871
c1092312_g1_i2	RTJK_DROME	-1.12771	0.000799574
c1085119_g4_i2	FGD1_MOUSE	6.67089	0.000803265
c1057105_g1_i1	AIFM2_TAEGU	6.75814	0.000803396
c1090619_g2_i1	B3GN2_MOUSE	-3.52236	0.000806257
c1076511_g3_i1	DPEP2_MOUSE	-7.2286	0.000815082
c1092808_g1_i3	RTF21_SCHPO	-1.22715	0.000825418
c1085039_g1_i2	CK024_HUMAN	-3.77901	0.000825418
c1071427_g1_i1	ICK_HUMAN	3.53953	0.000842282
c1089760_g3_i4	FOXO1_XENTR	-7.14766	0.000842889
c1074430_g3_i4	UP44B_XENLA	6.86326	0.000846361
c1091100_g1_i1	FINC_BOVIN	1.47061	0.000846361
c1081954_g2_i4	SNF5_XENLA	6.98803	0.00084818
c1086762_g2_i4	PRDM1_HUMAN	1.81726	0.000865393
c1079136_g2_i1	UFO_HUMAN	1.60157	0.000883082
c1077869_g1_i4	CRVP_HOPST	-2.30287	0.000910271
c1080775_g2_i5	ARI5A_MOUSE	5.52934	0.000924841
c1092581_g2_i3	EXTN_MAIZE	-1.21999	0.00092571
c1070215_g1_i3	HAUS5_MOUSE	-6.89986	0.000929537
c1075036_g3_i3	PKN1_THETN	6.8671	0.000930802
c1069539_g1_i1	OCSTP_HUMAN	2.51888	0.000944066
c1085974_g3_i4	PUR9_MOUSE	3.87879	0.000961066
c1067404_g1_i1	COX7C_PIG	2.23083	0.000961715
c1090056_g2_i5	PGBM_HUMAN	1.28991	0.000984466
c1080219_g2_i1	ZN827_HUMAN	6.80285	0.00098816
c1092812_g1_i1	MYPOP_MOUSE	-1.73439	0.000992024
c1090479_g1_i1	ITAE_HUMAN	-1.67922	0.000993665
c1092026_g1_i1	RNF13_BOVIN	6.98462	0.00100039
c1084392_g3_i2	DAPK3_HUMAN	1.15676	0.00100959
c1072955_g1_i3	ITB7_HUMAN	1.81539	0.00101684
c1070684_g6_i1	TM100_BOVIN	6.84694	0.00101752
c1087354_g4_i1	CHSTA_PONAB	6.84694	0.00101752
c1081710_g3_i2	HARB1_XENLA	-3.12447	0.00103857
c1089160_g1_i4	CT072_HUMAN	7.03234	0.00106773
c1083069_g3_i4	SIK2_HUMAN	4.65501	0.00107705
c1085859_g1_i3	IFM3_RAT	1.88817	0.00107791
c1089085_g1_i1	HARB1_BOVIN	-1.83372	0.00108267
c1085588_g3_i2	PGTB1_MOUSE	6.61066	0.00108376
c1070215_g1_i2	HAUS5_MOUSE	6.67544	0.00113636
c1051648_g1_i2	PPM1H_XENTR	6.60068	0.00115414
c1069699_g1_i4	ANR26_HUMAN	6.37791	0.00116358
c1056925_g1_i2	CBPM_HUMAN	6.76243	0.00116832
c1033275_g2_i1	VTC1A_DANRE	1.5761	0.00117336
c1081710_g1_i6	HARB1_BOVIN	-2.75064	0.00117685
c1066879_g2_i3	TRI33_HUMAN	6.6341	0.00118615
c1070693_g5_i1	TRI39_RAT	2.15695	0.00121939
c1090947_g1_i1	RTJK_DROME	-1.52998	0.00122521
c1061328_g1_i2	GALK1_BOVIN	-6.68532	0.00123601
c1084789_g2_i2	FMNL2_HUMAN	1.98022	0.00123953
c1077785_g6_i2	5N3LA_XENLA	6.89246	0.0012461
c1085882_g2_i2	MYPT2_HUMAN	6.82936	0.00125131
c1080680_g8_i1	MMP14_BOVIN	1.12612	0.0012592
c1046955_g1_i1	LIN1_NYCCO	7.47207	0.00126316
c1077451_g8_i1	PERF_HUMAN	-1.34245	0.00127617
c1051120_g2_i3	TTLL4_HUMAN	6.66487	0.00128522
c1071665_g1_i2	HARB1_DANRE	-1.99815	0.00129519
c1089344_g3_i3	ZBT43_HUMAN	-6.68527	0.00131231
c1091724_g2_i1	MYPOP_MOUSE	-1.68044	0.00131974
c1055603_g1_i1	TLR7_HUMAN	1.35551	0.00132419
c1091262_g3_i3	GPSM1_MOUSE	-5.68732	0.0013349
c1085691_g2_i3	EFNA5_HUMAN	6.90415	0.00134152
c1067798_g1_i3	SEM4A_HUMAN	2.09983	0.00135242
c1089452_g2_i4	RTJK_DROME	-1.83425	0.00137762
c1089084_g2_i1	MNN4_YEAST	2.90897	0.00139845
c1078384_g3_i1	RTJK_DROME	-1.12302	0.00141517
c1075150_g2_i7	CARD6_HUMAN	4.93022	0.00146714
c1070818_g1_i2	HARB1_DANRE	-1.98888	0.0014764
c1080124_g1_i2	RTP3_MOUSE	6.07787	0.00148381
c1081333_g2_i2	T2EB_XENLA	-6.78375	0.00148716
c1080781_g4_i2	ICLN_CANFA	2.15989	0.00149887
c1070331_g3_i1	B2MG_BOVIN	1.31019	0.00151285
c1071665_g1_i1	HARB1_DANRE	-1.73522	0.00153693
c1091733_g1_i1	SYT5_HUMAN	-1.47069	0.00155503
c1079774_g1_i1	TRAK1_HUMAN	6.69264	0.00155902
c1069055_g1_i1	SNX22_HUMAN	-6.69538	0.0015605
c1032874_g1_i1	POL_SOCMV	1.50233	0.00156289
c1073127_g1_i1	PPA6_HUMAN	6.66236	0.00156289
c1073597_g1_i1	MYPOP_MOUSE	-2.37361	0.00156483
c1087486_g2_i7	SAM9L_HUMAN	2.04698	0.00163131
c1053668_g1_i3	D19L3_HUMAN	-6.66472	0.00169659
c1090600_g1_i7	GCSH_CHICK	6.65704	0.00173132
c1088527_g2_i4	AT2B2_MOUSE	1.83072	0.00173895
c1058671_g1_i6	MPND_MOUSE	6.51001	0.00174066
c1082860_g1_i1	CXG1_BOVIN	-6.75976	0.00175045
c1046138_g1_i2	GTAN_DICDI	-1.87254	0.00181493
c1086823_g4_i1	PAR12_HUMAN	1.58757	0.00186203
c1278285_g1_i1	RTL1_MOUSE	2.62625	0.00188975
c1066969_g6_i4	SAM9L_HUMAN	1.6891	0.0019036
c1064030_g3_i1	RB_CHICK	2.10137	0.00190693
c1080943_g2_i1	B3GN5_XENTR	1.09297	0.00192404
c1088673_g2_i1	GANAB_HUMAN	6.61096	0.00192594
c1078263_g2_i2	ARSI_CANFA	6.70005	0.00197476
c1066587_g2_i1	CX6B1_TARSY	1.38975	0.00201359
c1079831_g1_i1	DOCK4_HUMAN	3.41624	0.00203171
c1084521_g1_i2	POL2_MOUSE	1.70068	0.00203966
c1085886_g2_i1	PHAG1_HUMAN	6.64245	0.00206051
c1080974_g5_i1	CHUR_XENTR	6.44535	0.00206128
c1076184_g1_i1	RM44_HUMAN	6.5757	0.00212636
c1084797_g8_i1	SDCB1_HUMAN	6.47781	0.00213286
c1081710_g1_i5	HARB1_BOVIN	-2.0415	0.00213949
c1068589_g1_i2	FOSL2_CHICK	1.28874	0.00214346
c1079892_g1_i1	ARRD2_HUMAN	1.85001	0.00214353
c1091893_g1_i2	SLIP_HUMAN	1.46149	0.00214353
c1076835_g4_i1	MTBP_XENTR	6.46641	0.0021571
c1074928_g2_i1	EM55_CHICK	2.34503	0.0021571
c1075388_g2_i2	SYTC_HUMAN	6.5252	0.00217375
c1083784_g1_i1	STOM_HUMAN	1.09943	0.00217571
c1087098_g1_i4	PDK4_MOUSE	2.52983	0.00218827
c1076138_g1_i1	UBP18_HUMAN	4.3243	0.00218827
c1006931_g2_i1	RTL1_HUMAN	-3.65367	0.00220013
c1069322_g3_i1	HMDH_MOUSE	1.78478	0.00226015
c1070757_g1_i2	PIAS2_HUMAN	6.46015	0.00228563
c1061708_g2_i1	HSP74_HUMAN	1.46566	0.00231568
c1083188_g2_i1	PDIA4_HUMAN	1.22579	0.00233547
c1057257_g1_i4	GUAA_HUMAN	6.68335	0.00233651
c1081710_g1_i4	HARB1_BOVIN	-2.3289	0.00233704
c1089377_g1_i4	F116A_HUMAN	3.25178	0.00233704
c1078182_g8_i5	KLC1_PONAB	6.62121	0.00235753
c1068588_g2_i1	RL10A_RAT	1.07466	0.00235754
c1086809_g3_i5	BI1_BOVIN	1.13984	0.00238554
c1084919_g4_i4	S35F5_MOUSE	6.48198	0.0024031
c1081670_g1_i3	CO1A1_CYNPY	-1.73716	0.0024587
c1090965_g2_i4	POL_MLVFP	-1.70125	0.00247905
c1070214_g1_i1	TRAF3_MOUSE	3.98682	0.00248235
c1069511_g1_i2	MTMRE_HUMAN	6.74462	0.00249447
c1071119_g1_i2	SDC2_HUMAN	1.99238	0.00253842
c1087615_g1_i2	SRC_CHICK	1.54819	0.00259183
c1051168_g1_i2	GP146_XENLA	6.49263	0.00259619
c1079389_g1_i3	RBP1_HUMAN	2.29435	0.00261525
c1078738_g1_i1	MMP2_HUMAN	1.06634	0.00262646
c1044390_g3_i1	HARB1_HUMAN	-3.54109	0.00270271
c1063165_g10_i5	YPEL5_PONAB	6.68434	0.00273784
c1075955_g1_i3	FBX28_HUMAN	4.5888	0.00274916
c1040529_g1_i1	TF3C4_HUMAN	6.37531	0.00274916
c1086963_g3_i2	NKX25_XENLA	-2.89817	0.00286684
c1080973_g6_i1	ABRA_PIG	-2.69778	0.00288708
c1079111_g1_i4	CBS_HUMAN	-6.49093	0.00295576
c1091147_g1_i4	ACOT2_HUMAN	-6.09628	0.00295581
c1073213_g1_i1	SMAD4_RAT	-5.47813	0.00301812
c1064089_g1_i4	ZN507_HUMAN	6.51204	0.00304963
c1096498_g1_i1	KRA43_HUMAN	-6.82717	0.00307272
c1059828_g4_i3	PIGR_RAT	3.26106	0.00317058
c1081788_g2_i3	GALT1_HUMAN	2.25872	0.00317075
c1090781_g1_i12	HARB1_DANRE	-2.23599	0.00319379
c1087084_g2_i2	HIP1R_HUMAN	6.42715	0.00320042
c1087826_g4_i1	POL2_DROME	-1.96447	0.00321727
c1088748_g2_i1	COL12_CHICK	1.39347	0.00321727
c1090770_g1_i4	HARB1_HUMAN	-1.46962	0.00325064
c1087313_g1_i1	POL2_MOUSE	-2.1122	0.00330459
c1086923_g3_i5	YSNK_CAEEL	-6.50661	0.00336042
c1086604_g8_i1	CCNK_HUMAN	-1.91142	0.00336042
c1080800_g2_i7	LIN1_NYCCO	-1.64081	0.00339526
c1067151_g4_i2	LIN1_NYCCO	5.2764	0.00342481
c1088620_g1_i1	COL12_RAT	1.44117	0.00342502
c1088729_g3_i3	RED1_HUMAN	-6.68341	0.0034724
c1069554_g1_i4	DCE1_FELCA	-6.7076	0.00349563
c1088622_g1_i2	RGMA_CHICK	6.35558	0.00360628
c1082381_g6_i2	HYAL1_PIG	-1.23313	0.00362249
c1048252_g1_i1	MOCS3_DANRE	6.36464	0.00366246
c1083840_g1_i4	BTNL9_MOUSE	5.35608	0.00369545
c1049919_g1_i1	COMP_MOUSE	1.49515	0.00370736
c1082709_g6_i1	LRX3_ARATH	-3.19283	0.00371009
c1090669_g4_i3	RTJK_DROME	-1.30546	0.00372302
c1083369_g7_i1	HMGX3_HUMAN	-6.59672	0.00372302
c1086012_g2_i1	NP1L4_RAT	6.31813	0.00375296
c1063443_g3_i2	LIN1_NYCCO	-6.74289	0.00375467
c1089078_g8_i2	TGM1_CANFA	4.09569	0.00376847
c1092453_g2_i2	RTJK_DROFU	-2.02935	0.0038193
c1076806_g8_i5	YI31B_YEAST	-1.87247	0.00382564
c1083030_g4_i8	CD63_RAT	1.82805	0.00390426
c1091366_g1_i7	G6PT1_HUMAN	-6.41713	0.00391941
c1089936_g8_i1	ITPR3_HUMAN	1.49557	0.00392937
c1068920_g6_i3	NCOR1_HUMAN	6.14092	0.00394402
c1035197_g1_i1	IOD3_LITCT	2.02036	0.00396616
c1090768_g2_i1	PEG10_MOUSE	-1.27406	0.00399142
c1071962_g7_i3	NEO1_CHICK	6.63971	0.00403505
c1079709_g4_i5	PCDH9_HUMAN	-6.68082	0.00408644
c1091645_g2_i2	POL4_DROME	1.93758	0.00410134
c1088917_g3_i1	ASAP3_HUMAN	2.0155	0.00411613
c1075836_g3_i3	KAT2A_HUMAN	6.53578	0.00416437
c1071485_g2_i1	P2RY4_RAT	1.26274	0.00417528
c1077859_g5_i1	CYLD_BOVIN	6.4222	0.00418098
c1084742_g1_i4	PARN_XENLA	6.32663	0.00418556
c1091961_g2_i1	ANXA1_HORSE	1.28225	0.00420792
c1088095_g1_i1	ZCHC3_HUMAN	-4.40536	0.00421017
c1065043_g1_i5	ZN821_HUMAN	6.28552	0.00422487
c1076863_g1_i2	ATG9A_BOVIN	4.18815	0.00431652
c1091720_g1_i1	LIN1_NYCCO	-1.29978	0.00431652
c1092469_g6_i5	MTM1_XENTR	1.5492	0.00437229
c1071419_g2_i3	CG059_DANRE	-1.76051	0.00437786
c1062702_g1_i1	CLIC2_HUMAN	-1.99133	0.0043838
c1079702_g3_i1	YTX2_XENLA	-1.86317	0.00440815
c1077771_g3_i3	KI20A_HUMAN	6.27866	0.0044649
c1092244_g2_i1	LIMS2_HUMAN	-1.56563	0.00449267
c1071594_g3_i2	F169B_MOUSE	6.29549	0.00450406
c1072208_g1_i2	ACSM3_PONAB	6.28656	0.00450856
c1073709_g1_i2	TRI25_MOUSE	1.78718	0.00450983
c1072788_g1_i1	CNPY2_HUMAN	2.03257	0.00458544
c1571348_g1_i1	HARB1_HUMAN	1.85144	0.0045901
c1055781_g1_i3	TM14A_HUMAN	3.77908	0.00467552
c1065587_g1_i2	FRRS1_BOVIN	-6.4778	0.00481303
c994686_g1_i1	STEA1_PIG	2.92941	0.00487918
c1070665_g1_i1	EVI2A_HUMAN	1.19176	0.00489416
c1066866_g1_i5	MYPOP_XENLA	-2.77738	0.00496442
c1079132_g5_i3	POL2_MOUSE	5.94378	0.00497724
c1070338_g1_i1	HARB1_HUMAN	-1.50336	0.00497724
c1072304_g2_i2	RTJK_DROME	-2.69619	0.00500495
c1067239_g7_i2	RCN1_HUMAN	1.63956	0.00502483
c1061955_g1_i1	NDST1_XENTR	1.30644	0.00502726
c1085402_g1_i4	SUCO_HUMAN	1.39798	0.00502742
c1082586_g1_i2	LIN1_NYCCO	3.35447	0.0050841
c1091100_g1_i2	FINC_BOVIN	1.13002	0.00511032
c1083669_g1_i3	ITAV_CHICK	2.02953	0.00513197
c1075498_g2_i1	SUGP2_HUMAN	6.37942	0.00514674
c1075013_g1_i1	HARB1_DANRE	-1.92674	0.00515793
c1091721_g1_i2	POL3_DROME	1.88825	0.00518642
c1073186_g2_i1	CBX5_HUMAN	-1.30441	0.00524408
c947658_g1_i1	POL_WDSV	1.7061	0.0052906
c1071943_g3_i1	MX2_RAT	1.95557	0.00535778
c1063599_g1_i2	SLAIL_XENTR	6.40577	0.00535778
c1087543_g1_i2	TSNA1_HUMAN	-1.95419	0.00538938
c1085529_g1_i1	IGSF3_HUMAN	1.2927	0.00539601
c1057374_g2_i3	UK114_CAPHI	6.27464	0.00539601
c1083473_g1_i7	RBG1L_HUMAN	1.28075	0.00543341
c1088673_g2_i4	GANAB_HUMAN	1.56276	0.00548864
c1085109_g3_i1	P4HTM_MOUSE	-1.47984	0.00550158
c1045482_g1_i5	RCC1_XENLA	6.31703	0.00563618
c1083118_g3_i1	POL2_MOUSE	6.3874	0.00564175
c1089172_g4_i1	UTRO_HUMAN	3.96595	0.00564501
c1070272_g2_i6	ATX2L_MOUSE	-1.62106	0.00565756
c1092295_g4_i1	POL2_MOUSE	-1.2671	0.00566146
c1077061_g1_i9	CHD4_MOUSE	1.2867	0.00568225
c1071492_g1_i2	CO9_HORSE	1.50725	0.00574267
c1086425_g2_i1	CG055_RAT	-1.05049	0.00574969
c1052751_g1_i1	MDHC_HUMAN	1.64467	0.00575932
c1088095_g1_i2	ZCHC3_HUMAN	-4.07319	0.00576212
c1091844_g1_i2	MKL2_HUMAN	4.12797	0.00578154
c1086762_g2_i5	PRDM1_MOUSE	2.41418	0.0058556
c1088299_g3_i15	HNRPU_HUMAN	3.94468	0.0058556
c1079473_g6_i2	TOR1B_MOUSE	1.76501	0.00591545
c1087698_g2_i1	LIN41_MOUSE	1.88646	0.00598394
c1086425_g2_i3	CG055_RAT	-1.99447	0.00600897
c1064348_g8_i1	FBN2_HUMAN	1.13939	0.00618265
c1082182_g13_i1	POL_WDSV	1.46061	0.0061944
c1068693_g1_i1	PHF6_MOUSE	1.33375	0.00625408
c1075891_g2_i1	T176B_MOUSE	1.30289	0.00629169
c1054166_g2_i1	ENTP1_MOUSE	1.35131	0.00630015
c1088077_g2_i1	ATPA_XENLA	1.29375	0.00630799
c1079507_g2_i2	STAT1_PIG	2.33112	0.00662587
c1070016_g1_i1	IC1_HUMAN	1.59629	0.0066573
c1071452_g1_i1	AIFM3_MOUSE	-8.8216	0.0069993
c1073633_g3_i5	POL2_DROME	-1.34803	0.00703643
c1084103_g2_i1	C1QA_RAT	1.09412	0.00709731
c1083820_g1_i2	RTF23_SCHPO	-1.49153	0.00712529
c1084704_g3_i3	MIDA_HUMAN	3.68904	0.00712529
c1081324_g1_i5	CUL9_HUMAN	1.22224	0.00718052
c1077192_g5_i3	SMG1_HUMAN	1.14833	0.00721212
c1087847_g3_i1	TNF13_HUMAN	3.21347	0.00721704
c1067503_g2_i3	MAML2_HUMAN	6.43522	0.00721704
c1073381_g3_i1	HEM4_HUMAN	-4.33736	0.00728813
c1066038_g2_i1	RL3_RAT	1.31765	0.00731049
c1067485_g1_i2	HARB1_HUMAN	-1.36998	0.00733591
c1080655_g2_i7	ENTP4_HUMAN	2.78041	0.00735088
c1090064_g1_i1	RN5A_HUMAN	2.2778	0.00738326
c1068313_g3_i4	GIN1_BOVIN	-6.52625	0.00747296
c1083615_g4_i1	LIN1_NYCCO	-2.41809	0.00752749
c1081214_g9_i3	VPP4_MOUSE	-1.98987	0.0075344
c1090401_g2_i2	ZN609_MOUSE	8.41973	0.0076102
c1071148_g1_i1	TUT7_HUMAN	1.43276	0.00772047
c1083727_g1_i2	HEM0_MOUSE	-2.54908	0.0077645
c1081317_g1_i2	RRAS_HUMAN	1.08672	0.00776552
c1090317_g4_i1	LIN1_NYCCO	-1.91538	0.00792669
c1091380_g1_i1	HARB1_DANRE	-1.89878	0.00794768
c1089122_g2_i6	ABD12_XENTR	3.50618	0.00802609
c1062042_g3_i2	NU205_HUMAN	1.49182	0.00803283
c1085859_g1_i4	IFM3_RAT	1.76874	0.00804518
c1083067_g2_i2	CTR3_HUMAN	2.19511	0.00806501
c1069330_g1_i7	SRA1_RAT	5.04431	0.00810807
c1078459_g1_i2	RENR_PONAB	1.0094	0.008231
c1063613_g1_i1	LECA_PLEWA	-1.44303	0.0083056
c1084174_g4_i1	LIN1_NYCCO	2.38016	0.0083216
c1045253_g1_i3	CNOT7_HUMAN	4.47405	0.00849687
c1027882_g1_i1	TLR3_BOSTR	1.61678	0.00856517
c1076256_g2_i2	POL_SFV1	1.32909	0.00858396
c1087208_g1_i3	ZFP27_MOUSE	6.15544	0.00859644
c1082504_g1_i2	TSNA1_HUMAN	-1.53156	0.00863
c1087256_g1_i10	SYNE3_HUMAN	1.25901	0.00867075
c1077266_g3_i1	SMYD3_HUMAN	1.90962	0.00871462
c1065747_g1_i2	KCRB_BOVIN	2.41284	0.00871518
c1075583_g1_i2	TM140_HUMAN	-3.584	0.00871518
c1092773_g3_i2	HARB1_HUMAN	-1.29776	0.00874348
c1070934_g2_i8	PSIP1_CHICK	-4.80288	0.00875659
c1059964_g3_i1	SETB1_HUMAN	2.0528	0.008778
c1078449_g1_i1	LSM1_HUMAN	6.19915	0.0088041
c1081981_g3_i2	EMC1_CHICK	3.81733	0.0088041
c1078446_g3_i2	ZN711_HUMAN	1.8938	0.00882891
c1088351_g1_i7	IL18_CHICK	1.15757	0.00889873
c1087543_g1_i1	TSNA1_HUMAN	-1.72935	0.00904743
c1088059_g1_i1	EIF1_PONAB	2.60845	0.00905526
c1083123_g2_i1	IFIH1_HUMAN	1.49104	0.00925148
c1090013_g2_i3	POL_FENV1	-1.25062	0.00936644
c1089780_g3_i1	POL_GALV	-2.28396	0.00940119
c1073800_g1_i2	ZCCHV_MOUSE	1.78004	0.00945924
c1076160_g3_i1	HARB1_MOUSE	-2.6902	0.00953596
c1084675_g2_i4	M21D1_HUMAN	2.26172	0.00962641
c1083242_g3_i7	IF4H_RAT	5.68843	0.00970408
c1083464_g1_i6	TFR2_HUMAN	-2.43936	0.00973438
c1077640_g1_i1	TM119_MOUSE	1.62741	0.00980263
c1087280_g3_i1	ADB4C_MELGA	-1.7349	0.00986649
c1081920_g2_i12	ADDG_HUMAN	-4.02556	0.0100377
c1090154_g1_i1	HARB1_DANRE	-1.86138	0.0100377
c1071943_g2_i3	MX1_MACMU	1.73193	0.0100504
c1080224_g1_i1	IL1B_RABIT	-5.12927	0.0101655
c1083603_g1_i2	RTF23_SCHPO	-1.06342	0.0101684
c1028090_g1_i1	POL_BAEVM	2.34657	0.0101848
c1090372_g4_i12	B3GN3_HUMAN	-6.24813	0.0102452
c1089988_g1_i4	ZN362_HUMAN	6.62417	0.0102981
c1069508_g1_i2	CAN15_MOUSE	6.33267	0.0104617
c1063644_g1_i1	GAT1B_XENLA	-2.23795	0.0106706
c1068589_g1_i1	FOSL2_CHICK	1.50654	0.0106934
c1062758_g1_i1	GRSF1_MOUSE	4.40857	0.0107407
c1092332_g1_i1	ROBO4_HUMAN	1.29881	0.0108459
c1087617_g1_i3	AT133_HUMAN	1.60622	0.0108468
c1080572_g4_i1	UN93B_MOUSE	1.10779	0.0109577
c1072341_g6_i1	OASL_HUMAN	1.57347	0.0109577
c1084163_g1_i1	RTJK_DROME	-1.36646	0.01096
c1087059_g8_i1	AMPM2_BOVIN	1.20266	0.0110326
c1084774_g1_i2	SEPT7_XENLA	-6.28979	0.0110357
c1089878_g1_i3	RALBB_XENLA	1.19471	0.0110545
c1074212_g1_i1	GDIB_HUMAN	1.15033	0.0111439
c1073917_g1_i2	RTF23_SCHPO	2.05142	0.0114005
c1078938_g2_i6	AIDA_PONAB	6.26043	0.0114005
c1067192_g2_i1	GILT_BOVIN	1.61055	0.0114005
c1089348_g4_i3	KCC1A_RAT	3.27152	0.011411
c1075013_g1_i5	HARB1_DANRE	-1.64997	0.0114315
c1087098_g1_i2	PDK4_MOUSE	-2.97954	0.0115686
c1085939_g2_i1	SHRM1_XENLA	-6.1721	0.0116989
c1085664_g1_i1	POL_FENV1	-1.70848	0.0117576
c1079026_g1_i2	TGM5_HUMAN	-3.35204	0.0118257
c1085849_g10_i1	MT21D_MOUSE	3.58605	0.0118512
c1086937_g3_i8	ANTR1_MOUSE	4.79123	0.0120531
c1077625_g1_i2	E2AK2_RAT	2.02625	0.0121053
c1091947_g2_i1	GBLP_RAT	3.12879	0.0121053
c1075803_g2_i2	NFKB2_XENLA	1.35022	0.0121513
c1088332_g1_i4	TENA_CHICK	1.34523	0.0123794
c1075298_g7_i4	B3A2_HUMAN	1.51783	0.0125468
c1081407_g2_i1	PI15_HUMAN	2.82017	0.0125663
c1073837_g2_i1	ADCY7_HUMAN	1.30348	0.0126839
c1072875_g6_i2	ANXA7_BOVIN	1.32252	0.0128161
c1084143_g2_i4	ZN469_HUMAN	6.12072	0.0128243
c1067527_g1_i1	SNG2_BOVIN	1.26108	0.0131161
c1090600_g1_i8	GCSH_CHICK	5.66991	0.0131613
c1070727_g1_i1	LEC_THRJA	1.12928	0.013278
c1088028_g1_i1	HYOU1_CHICK	1.49782	0.0133251
c1072532_g4_i1	SOCS3_CHICK	2.32327	0.0133771
c1078658_g1_i2	RS10_HUMAN	2.26038	0.0135486
c1088192_g7_i1	OASL2_MOUSE	2.47587	0.0138471
c1092594_g2_i1	PICA_MOUSE	1.28265	0.0138547
c1049178_g1_i3	MYC_CHICK	1.33047	0.0138627
c1084894_g4_i1	TDH_BOVIN	1.57284	0.0138657
c1079732_g4_i1	POL2_MOUSE	1.61302	0.013913
c1073614_g1_i1	CCR3_CAVPO	1.70582	0.0139311
c1077266_g2_i1	MMP18_XENLA	1.33788	0.014201
c1069062_g3_i1	AP1M1_HUMAN	1.28013	0.0142935
c362882_g1_i1	POL2_MOUSE	2.30317	0.0144009
c1090995_g1_i1	MDFIC_XENLA	1.72684	0.0144482
c1086839_g1_i7	NASP_RABIT	1.39521	0.0144482
c1081982_g3_i2	MCTP2_MOUSE	6.00892	0.0146576
c1076902_g1_i6	TAU_MACMU	-3.12118	0.0146772
c1074716_g1_i2	ERGI1_HUMAN	1.48898	0.0147486
c1088059_g1_i3	EIF1_PONAB	1.01592	0.0148109
c1091100_g3_i1	FINC_XENLA	1.42273	0.0149628
c1058305_g1_i2	BL1S1_MOUSE	6.07268	0.0149899
c1070446_g2_i2	POL3_DROME	-1.36311	0.015209
c1086311_g1_i1	TPIS_CHICK	1.57819	0.0152192
c1088557_g1_i2	NMI_MOUSE	2.57196	0.0152847
c1087163_g1_i5	TSNA1_HUMAN	-1.62294	0.0155213
c1077331_g2_i1	RTF23_SCHPO	-2.2427	0.0157748
c1083713_g1_i7	CALD1_CHICK	3.30331	0.0158772
c1088203_g6_i2	FAAH1_HUMAN	4.49426	0.0159241
c1089541_g3_i1	POL2_MOUSE	-1.03467	0.0159446
c1080893_g2_i5	MAP1A_HUMAN	1.1981	0.0160146
c1067250_g2_i2	PSA7_BOVIN	1.30981	0.0160308
c1031698_g1_i1	VATE1_MOUSE	1.04359	0.0160545
c1079206_g7_i4	POL3_DROME	2.25398	0.0161117
c1083005_g1_i3	VPS11_HUMAN	4.58806	0.0161714
c1077113_g5_i6	EFC1_PANTR	1.57496	0.0162706
c1083951_g2_i1	RTXE_DROME	-1.47197	0.0162785
c1068935_g1_i4	PIM3_COTJA	5.95413	0.0163381
c1070727_g1_i2	PGCA_HUMAN	1.14196	0.0163535
c1090290_g1_i1	EMIL1_MOUSE	1.20963	0.016364
c1058344_g1_i2	TLR6_BOVIN	-6.39678	0.016364
c1063497_g1_i1	IPO7_HUMAN	1.2072	0.0164004
c1070232_g1_i7	RGS3_HUMAN	2.32028	0.0165984
c1090479_g2_i2	HARB1_RAT	-1.46873	0.0166224
c1080343_g1_i1	ANK1_MOUSE	-3.43505	0.016655
c1090315_g1_i3	MYH3_MOUSE	6.47934	0.0167778
c1078643_g1_i3	F125A_HUMAN	2.21893	0.0170358
c1045748_g2_i5	TFIP8_BOVIN	1.54271	0.0170567
c1089533_g3_i1	CP1B1_HUMAN	2.10244	0.0170732
c1078250_g1_i5	HCD2_HUMAN	2.78991	0.0172521
c1091260_g3_i4	FLNA_HUMAN	1.69581	0.0173436
c1058421_g1_i1	RTJK_DROME	-1.8532	0.0173605
c1092114_g1_i2	YI31B_YEAST	-1.35264	0.0174375
c1059816_g1_i3	UBP42_HUMAN	6.1946	0.0174732
c1087296_g1_i3	NYNRI_HUMAN	-1.36761	0.0176449
c1065026_g1_i4	F135A_HUMAN	3.8717	0.0178062
c1091856_g2_i1	H2B12_XENLA	-2.37765	0.0178418
c1078975_g3_i3	BCAR1_MOUSE	1.92075	0.0180992
c1089305_g3_i2	POL2_MOUSE	-2.18276	0.0183628
c228368_g2_i1	LWA_ANTEL	-6.45048	0.0184854
c1091090_g2_i1	F13A_HUMAN	1.28991	0.018555
c1078081_g1_i1	ODBB_BOVIN	2.15795	0.018591
c1087929_g5_i1	ZMIZ1_MOUSE	3.70508	0.0186311
c1090877_g2_i3	GPDA_RAT	2.20137	0.018657
c1069424_g1_i1	HBB2_TRICR	-3.49617	0.0187822
c1081067_g1_i1	LITD1_HUMAN	-2.41725	0.0188187
c1072581_g2_i1	ZN639_HUMAN	4.91162	0.0188187
c1080781_g1_i1	RTF23_SCHPO	-1.05812	0.0189581
c1080570_g1_i1	RTF21_SCHPO	-1.23096	0.019059
c1065479_g1_i1	SEP15_DANRE	1.93938	0.019059
c1051007_g1_i1	SHC3_HUMAN	2.78428	0.019198
c1071528_g1_i1	HARB1_RAT	-2.453	0.0195163
c1066435_g2_i2	PCNT_HUMAN	-1.09154	0.019657
c1070846_g1_i3	AFAP1_CHICK	5.9127	0.0196865
c1065135_g1_i3	STIM2_HUMAN	4.3096	0.0200473
c1092035_g1_i1	PR285_HUMAN	1.50837	0.0200752
c1075013_g1_i3	HARB1_BOVIN	-1.86855	0.0201704
c1073890_g2_i2	SYJ2B_BOVIN	1.4823	0.0201848
c1085576_g3_i3	ECHA_MOUSE	2.32103	0.0202774
c1083263_g1_i2	MDHM_RAT	2.17156	0.0205609
c1092369_g3_i1	ATN1_RAT	-1.78928	0.0205759
c1078994_g2_i2	CATK_HUMAN	2.37351	0.020743
c1092049_g1_i2	TCTP_CHICK	2.2332	0.0208484
c1078260_g1_i1	PSS_BACSU	1.7921	0.0210407
c1025450_g1_i1	PPP5_HUMAN	1.10468	0.0211104
c1046138_g1_i1	Y8359_DICDI	-1.95624	0.0214816
c1055908_g1_i2	ZRAB3_HUMAN	6.01273	0.0215581
c1090859_g5_i1	YD019_HUMAN	-1.33451	0.0216289
c1084583_g1_i1	KCC2D_RABIT	3.19403	0.0217894
c1072669_g11_i1	LNEBL_MOUSE	5.91367	0.0218226
c1086347_g2_i1	YI31B_YEAST	-2.20375	0.0218916
c1092404_g1_i1	MACF1_RAT	1.16511	0.021908
c1084577_g2_i1	OST48_XENLA	1.06983	0.0221999
c1081580_g1_i2	JMY_XENTR	1.68297	0.0224524
c1080763_g1_i2	TANC1_HUMAN	1.82993	0.0226991
c1070338_g2_i2	HARB1_RAT	-1.12728	0.022769
c1057508_g1_i1	YRD6_CAEEL	-2.12103	0.022769
c1077608_g3_i3	PMF1_HUMAN	3.35178	0.0228069
c1079176_g1_i1	SASH3_BOVIN	-3.86802	0.0228398
c1087325_g1_i1	LYOX_CHICK	1.75359	0.0228844
c1066969_g6_i2	SAM9L_HUMAN	2.10591	0.0230226
c1060345_g1_i1	GA45G_RAT	4.05801	0.0230226
c1080312_g2_i1	PRGC1_RAT	2.11642	0.0230226
c1068519_g1_i3	1433T_XENLA	1.50337	0.0230226
c965752_g1_i2	RAB35_RAT	2.10177	0.0231266
c1086017_g4_i5	MPRI_HUMAN	1.896	0.0233299
c1075833_g4_i4	KS6A3_MOUSE	1.05022	0.0233489
c1078709_g2_i3	MYPOP_XENLA	-4.43646	0.0233602
c1061299_g1_i1	SAP_BOVIN	-1.03711	0.0233602
c1077680_g1_i2	SC5A8_XENLA	2.22219	0.0234343
c1077110_g11_i1	MOB1B_MOUSE	1.11894	0.0234735
c1071391_g5_i1	RTL1_HUMAN	-1.54685	0.023625
c1090154_g1_i3	HARB1_RAT	-2.01893	0.0236431
c1086306_g1_i4	TIAM1_HUMAN	1.36023	0.0236566
c1083794_g1_i1	ESIP1_HUMAN	1.92943	0.0237366
c1073988_g1_i3	POL_MLVFP	2.28044	0.0237472
c1448019_g1_i1	YRD6_CAEEL	2.0305	0.0237967
c1060371_g1_i2	NFIP2_HUMAN	5.87946	0.0237995
c1091774_g1_i4	PKHL1_HUMAN	-4.78577	0.0238134
c1050533_g2_i3	COPT2_MOUSE	1.5182	0.023955
c1074870_g8_i2	HARB1_MOUSE	-2.07137	0.0241476
c1066902_g1_i5	IF2B2_HUMAN	1.21158	0.0241594
c1089681_g2_i1	NLRC4_XENTR	5.58203	0.024283
c944179_g1_i1	VGH_BPS13	-1.0804	0.0243531
c1067279_g6_i1	GRN_HUMAN	1.49352	0.0243815
c1083511_g1_i2	AP3M2_HUMAN	1.26024	0.0245071
c1082637_g1_i2	C1QRF_MOUSE	-2.03066	0.0247594
c1088531_g10_i1	MYPOP_XENLA	-1.62407	0.0249178
c1068399_g1_i1	LAMB3_HUMAN	-1.50429	0.0249938
c1088530_g5_i8	WNK1_RAT	1.00401	0.0250995
c1077998_g3_i3	RS2_ICTPU	1.04427	0.0253633
c1086425_g2_i2	CG055_RAT	-1.68961	0.0253975
c942925_g2_i1	YI31B_YEAST	4.76457	0.0256254
c1085348_g2_i2	NRP1_CHICK	1.11423	0.025978
c1080270_g3_i2	ZBT46_HUMAN	2.67538	0.025978
c1063358_g2_i1	TNPO3_HUMAN	1.60325	0.0263225
c1069953_g4_i1	HSDL2_XENTR	1.31279	0.0265186
c1079466_g2_i1	COPA_MOUSE	2.18861	0.0269125
c1083951_g1_i1	ZN567_HUMAN	-1.37808	0.0269662
c1081477_g3_i3	DOM3Z_BOVIN	1.75486	0.0269679
c1067892_g2_i3	RGPS2_HUMAN	5.80853	0.0270648
c1088658_g3_i4	TADBP_XENTR	2.97587	0.0271008
c1092655_g1_i1	YI31B_YEAST	-1.4679	0.0272411
c1072102_g1_i2	DHRS4_PIG	3.99925	0.0275306
c1089368_g3_i2	SEP11_HUMAN	2.9611	0.0277213
c1089370_g4_i3	M4K4_MOUSE	1.39539	0.0278314
c1083421_g1_i1	IL6RA_PIG	1.1254	0.0280801
c1082122_g6_i4	TNPO2_MOUSE	1.5651	0.0282918
c1078641_g3_i1	TREX2_MOUSE	1.44521	0.0283796
c1091356_g2_i2	POL_FENV1	-2.37834	0.0284037
c1063126_g1_i1	U88_HHV6U	-1.03753	0.0285105
c1029277_g2_i1	RRBP1_HUMAN	-5.54981	0.0286706
c1090615_g1_i3	TECR_HUMAN	4.29635	0.0287823
c1027363_g2_i1	VATB2_RAT	1.13309	0.0288135
c1081670_g1_i6	CO1A1_CYNPY	-1.21655	0.0288135
c1084814_g1_i2	ZN398_HUMAN	4.44325	0.028818
c1054841_g1_i1	RPC2_HUMAN	-6.17862	0.0288913
c1077688_g1_i2	MIB1_HUMAN	6.08695	0.0291008
c1078643_g1_i2	F125A_HUMAN	6.09187	0.0291008
c1073696_g1_i2	EFR3A_XENLA	2.83182	0.0292824
c1070190_g1_i1	T22D1_CHICK	2.14703	0.0293108
c1065687_g1_i2	NAMPT_PIG	1.67847	0.0294729
c1083272_g3_i3	DGAT2_XENLA	-2.8978	0.029672
c1077266_g2_i2	MMP18_XENLA	2.04199	0.0299205
c1086466_g1_i1	CD5L_HUMAN	1.32792	0.0299646
c1070684_g6_i2	TM100_BOVIN	-2.45835	0.0300299
c1074202_g1_i2	EPRA1_AERHY	1.76481	0.0301815
c1088445_g4_i1	EPHA3_CHICK	5.95844	0.0303405
c1061328_g1_i3	GALK1_BOVIN	1.96604	0.0303624
c1081311_g1_i1	OX2G_PONAB	2.0695	0.0304074
c1065777_g1_i3	ERMAP_HUMAN	1.79911	0.0304354
c1086307_g1_i6	SULF1_HUMAN	1.58129	0.0304527
c1071570_g4_i1	YI31B_YEAST	1.33178	0.030501
c1079695_g1_i4	PGES2_MOUSE	5.10608	0.0308411
c1079027_g1_i1	NUCKS_BOVIN	-3.24845	0.0308681
c1073633_g3_i4	POL3_DROME	-1.51278	0.0309301
c1079647_g2_i3	PP2AA_RABIT	4.11092	0.030983
c1070024_g2_i2	LITD1_HUMAN	5.83621	0.0310166
c1092852_g1_i1	PIF1_DANRE	-1.02208	0.031093
c1091806_g4_i1	CD48_MOUSE	-1.41668	0.0311679
c1085228_g7_i1	FAT1_HUMAN	1.08208	0.0312039
c1090585_g2_i2	COX5A_MOUSE	1.10358	0.0315769
c1090064_g2_i1	YRD6_CAEEL	1.49284	0.031681
c1079669_g1_i4	RNH_MARMM	-1.33957	0.031681
c1087788_g3_i6	PAR14_HUMAN	1.46509	0.031681
c1085653_g5_i1	POL2_MOUSE	1.01733	0.0318871
c796497_g1_i1	TMM33_HUMAN	1.80648	0.0318871
c1074474_g2_i3	ZSCA2_HUMAN	-3.88151	0.0321463
c1092253_g2_i1	CRLD2_XENTR	1.04073	0.0321599
c1092813_g3_i1	ANXA1_PANTR	4.20385	0.0321599
c1078672_g4_i4	ALG1_HUMAN	1.63005	0.0327107
c1073194_g2_i3	CTDS2_HUMAN	2.09183	0.0327282
c1084740_g3_i1	CR3L3_HUMAN	1.41886	0.0333097
c1061954_g1_i1	MRGRH_MOUSE	1.23965	0.0333397
c1085994_g1_i4	SMAP2_CHICK	3.18168	0.0334682
c1083370_g4_i1	TNF10_HUMAN	1.63322	0.0335044
c1177582_g1_i1	F_BPPHX	-1.07007	0.0335044
c1090634_g2_i1	S38AA_PONAB	1.61986	0.0336729
c1067185_g2_i2	NCOA7_HUMAN	1.60759	0.033734
c1087698_g2_i2	LIN41_MOUSE	1.70517	0.0337645
c1091081_g5_i7	FLNA_HUMAN	2.45398	0.033961
c1076392_g2_i1	S5A2_MACFA	1.88021	0.0344868
c1086379_g2_i1	HDX_CHICK	3.72876	0.0347775
c1031898_g1_i1	HAS2_HUMAN	1.36669	0.0348688
c1064796_g1_i1	DCDC2_MOUSE	-3.30228	0.034964
c1083257_g2_i6	TYY1_HUMAN	3.75073	0.0352397
c1089482_g7_i2	WDFY3_HUMAN	1.54632	0.0352397
c1077671_g7_i11	ZMYM2_HUMAN	4.16157	0.0352479
c1091277_g1_i3	LIN1_NYCCO	-1.48962	0.0353641
c1073268_g1_i2	TACC1_HUMAN	1.12259	0.0355295
c1081334_g4_i4	COX41_HUMAN	1.94506	0.0356988
c1073304_g3_i1	YRD6_CAEEL	-3.02948	0.0358467
c1085045_g1_i3	PEG10_HUMAN	-1.30369	0.036074
c1062451_g1_i1	TSN3_PONAB	1.00125	0.0361527
c1091810_g1_i1	ERVV2_HUMAN	-1.02121	0.0363115
c1083781_g4_i3	RTJK_DROME	-1.05582	0.0366198
c1084909_g2_i3	FA49A_CHICK	2.51263	0.0368588
c1058080_g1_i1	PHYD1_DANRE	-3.22729	0.0369138
c1062858_g2_i1	GLPC_HUMAN	-2.15556	0.0369543
c1070743_g1_i2	CH2BA_XENLA	2.67683	0.0370176
c1695693_g1_i2	VF337_IIV3	-6.03367	0.0373538
c1076912_g4_i2	XPO6_HUMAN	1.34253	0.0374933
c1075310_g1_i1	MYO5A_CHICK	1.77978	0.0376141
c1053088_g1_i1	TRFR_HUMAN	-2.31006	0.0377185
c1078595_g4_i3	DRAM1_MOUSE	1.53634	0.0377713
c1085039_g1_i5	CK024_HUMAN	2.63513	0.0377861
c1069744_g5_i7	CD276_HUMAN	2.97643	0.0378993
c1074973_g1_i3	ANTR2_HUMAN	1.057	0.0379865
c1056786_g1_i1	ARRD1_HUMAN	5.80235	0.0382065
c1068128_g5_i2	PEG10_HUMAN	-1.44087	0.0384435
c1066560_g1_i1	TM41A_HUMAN	-2.65105	0.0388009
c1072674_g1_i2	POL3_DROME	-1.39744	0.0389773
c1081144_g3_i3	MFN1_MOUSE	1.90889	0.0392144
c1090469_g1_i7	ADDA_HUMAN	3.89499	0.0392296
c1074342_g1_i1	SL9A6_HUMAN	1.85854	0.0394641
c1084875_g3_i4	RSMN_RAT	1.52686	0.0395153
c1078041_g3_i1	PLDX1_MOUSE	-1.33565	0.0396916
c1072961_g2_i4	LIN1_NYCCO	-1.69734	0.0398528
c1070737_g1_i2	RL7L_PIG	1.79438	0.0398933
c1066734_g1_i2	CFLAR_HUMAN	1.88267	0.0399508
c1090606_g8_i3	H33_XENTR	1.17377	0.0401439
c1076838_g1_i2	RTF21_SCHPO	3.21655	0.0404324
c1066962_g3_i2	SYNPO_MOUSE	1.66996	0.0404767
c1067239_g7_i1	RCN1_TAKRU	1.91401	0.0407823
c1080006_g4_i1	TRI39_RAT	2.30098	0.0410069
c1077172_g1_i3	ARMC8_BOVIN	2.01627	0.0411389
c1075951_g1_i1	VIPR_MELGA	-2.62531	0.0411568
c1092699_g3_i2	GYS1_RAT	-1.61163	0.0413128
c1068703_g9_i2	LEUK_RAT	-1.72258	0.0415666
c1088101_g1_i3	VPS8_HUMAN	8.87236	0.0416847
c1081458_g2_i1	PA2G4_MOUSE	1.0752	0.0422909
c1086951_g1_i1	MINK1_MOUSE	4.67062	0.0422916
c1054414_g2_i1	POL2_MOUSE	-1.41234	0.0422916
c1090770_g1_i5	HARB1_HUMAN	-1.28569	0.0422916
c1078234_g4_i6	NCOA1_MOUSE	2.06443	0.0423178
c1071002_g3_i5	JAK2_PIG	6.78473	0.0424311
c1080693_g2_i3	MYH10_HUMAN	1.06945	0.0424311
c1079590_g1_i1	PDIA6_MOUSE	1.38569	0.0425453
c1091906_g1_i3	MAST2_HUMAN	-3.12692	0.0426276
c1090471_g2_i1	SNX27_MOUSE	1.48019	0.0426501
c1082849_g1_i4	MYPOP_XENLA	-2.35628	0.04296
c1092409_g3_i1	TMED2_RAT	1.26912	0.0432614
c1062037_g1_i4	RTBS_DROME	-1.74236	0.0433142
c1070994_g1_i1	POL2_MOUSE	1.40439	0.0436105
c1086209_g2_i3	CLC2D_HUMAN	1.52284	0.0436311
c1070315_g7_i1	KLF10_HUMAN	-1.18647	0.0441683
c1084988_g1_i4	OGRL1_RAT	2.19334	0.0449221
c1072336_g2_i1	RTF23_SCHPO	-1.00598	0.045214
c1078218_g2_i2	H3_URECA	-3.66955	0.0454919
c1073054_g2_i2	MP2K2_CANFA	1.56341	0.0456742
c1090336_g1_i1	FYB_MOUSE	1.09654	0.0457676
c1085723_g3_i14	VATA_HUMAN	1.15802	0.0458489
c1079703_g2_i2	MUC16_HUMAN	-1.48701	0.0459985
c1037220_g2_i1	RTBS_DROME	2.41421	0.046066
c1034837_g1_i1	PCDGM_HUMAN	2.72013	0.0461536
c1092059_g1_i4	URGCP_BOVIN	1.62308	0.0462242
c1077982_g2_i4	MYPOP_MOUSE	-1.10155	0.0466583
c1083816_g1_i4	PCOC1_RAT	1.45547	0.0466961
c1074448_g1_i1	RN213_HUMAN	1.51309	0.0472377
c1092509_g4_i1	YRD6_CAEEL	1.36746	0.0475427
c1089084_g3_i1	PAR14_MOUSE	2.46514	0.0475427
c1065537_g2_i3	PRI2_MOUSE	1.73398	0.0475427
c1087429_g4_i4	NRP2_RAT	2.07998	0.047769
c1090567_g1_i2	HRPX_PLALO	-1.48473	0.047769
c1069559_g3_i1	RTBS_DROME	-1.26684	0.047769
c1074374_g1_i1	ATAD5_HUMAN	2.00836	0.0480409
c1083026_g4_i4	CPNS1_BOVIN	1.16961	0.0482986
c1064527_g1_i1	ANC2_HUMAN	5.83807	0.0484063
c1076125_g1_i4	U390_DANRE	-2.24834	0.0484181
c1087215_g7_i1	POL2_MOUSE	-1.08365	0.0485599
c1078801_g3_i2	NIPS2_HUMAN	1.50481	0.0486
c1083709_g5_i1	FAN1_HUMAN	3.45038	0.0486608
c1083080_g1_i1	TRI56_BOVIN	1.53422	0.0486977
c1085014_g5_i2	EIF3D_XENLA	1.86343	0.0489071
c1069422_g4_i2	EMR1_HUMAN	1.08389	0.0489684
c1086988_g1_i1	CCRL1_HUMAN	1.7162	0.0489684
c1071665_g2_i2	HARB1_DANRE	-1.92172	0.0490362
c1083727_g2_i1	HEM1_CHICK	-2.38874	0.0490362
c1078436_g8_i1	MGST3_HUMAN	2.76451	0.0492001
c1065131_g1_i1	TLR13_MOUSE	1.88528	0.0493737
c1056866_g2_i1	THIKA_RAT	1.78828	0.0497092
c1086377_g3_i3	SP4_HUMAN	5.67563	0.0498441
c1053855_g1_i2	PRKAA_XENLA	-3.69775	0.0499327
c1070818_g1_i1	HARB1_DANRE	-1.91233	0.0499626
