# Supplementary material for: Midkine is a dual regulator of wound epidermis development and inflammation during the initiation of limb regeneration
Source: eLife. 2020 Jan 14;9:e50765. doi: 10.7554/eLife.50765 (PMC6959999; doi:10.7554/eLife.50765)
Supplement: Supplementary file 3. — This excel table contains the list of differentially expressed transcripts in epithelial cells of full thickness skin vs. wound epithelial cells at 5 dpa. The respective fold change, blastx hit, and adjusted p-values are listed for each hit. [file elife-50765-supp3.xlsx]

## Sheet: Top_FSF_epi
transcript id	blastx hit	logFC	padj
c1090257_g1_i2	TSN15_MOUSE	10.6536	4.18e-12		Note: positive fold change indicates enrichment in regenerating wound epidermis, negative fold change indicates enrichment in epithelial cells of full skin flap
c1090300_g1_i1	CNN2_MOUSE	10.725	1.18e-11
c1086285_g2_i3	K1C24_HUMAN	10.4413	1.89e-11
c1092690_g1_i3	SACS_MOUSE	9.0019	1.89e-11
c1088639_g4_i1	RRT15_YEAST	-4.50823	7.17e-11
c1084101_g1_i2	TB182_MOUSE	11.3443	1.69e-10
c1090687_g2_i3	PTBP1_BOVIN	11.5115	3.14e-10
c1058430_g3_i1	K1C15_RAT	3.82164	3.9e-10
c1090600_g1_i6	GCSH_CHICK	5.62803	3.42e-09
c1090064_g1_i3	RN5A_HUMAN	2.47357	3.54e-09
c1088810_g1_i3	CO7A1_HUMAN	9.87232	3.92e-09
c1068399_g1_i2	LAMB3_HUMAN	9.32744	4.22e-09
c1084191_g3_i2	SMBT2_HUMAN	7.03077	1.18e-08
c1075471_g2_i4	TOP2A_CHICK	2.78172	1.92e-08
c1086457_g2_i4	PKN2_MOUSE	9.67432	2.29e-08
c972758_g1_i1	POLR_DROME	9.317	3.06e-08
c1083705_g1_i2	UN13D_HUMAN	-9.05496	3.79e-08
c1091613_g1_i2	TNR6A_HUMAN	8.99463	5.36e-08
c1086872_g4_i3	CYTC_RABIT	-9.4527	6.09e-08
c1092079_g1_i2	PANX1_MOUSE	-9.6685	8.97e-08
c1461347_g1_i1	MUC5A_HUMAN	-4.2019	1.03e-07
c1066879_g2_i1	TRI33_HUMAN	8.73172	1.11e-07
c1087857_g1_i1	MYO1C_CHICK	9.29333	1.13e-07
c1082467_g1_i2	ZBT11_HUMAN	8.73075	1.15e-07
c1087476_g1_i1	MUC5B_HUMAN	-3.22701	1.22e-07
c1081555_g1_i5	ETUD1_HUMAN	-8.82332	1.22e-07
c1091235_g1_i5	PRRT3_HUMAN	8.90666	1.57e-07
c1090681_g1_i3	FREM2_HUMAN	5.25495	1.6e-07
c1085139_g1_i4	PRDX4_HUMAN	8.727	2.18e-07
c1090393_g1_i4	HMGN2_PONAB	1.82035	2.18e-07
c1092564_g1_i4	JADE2_MOUSE	-9.22567	2.24e-07
c1079364_g6_i4	BRD7_CHICK	-9.4981	2.24e-07
c1091539_g2_i2	POL_WDSV	9.10041	3.02e-07
c1086995_g1_i2	FDFT_PONAB	-8.89581	5.76e-07
c1075095_g5_i2	MCATL_HUMAN	8.83198	7.18e-07
c1090795_g1_i1	MSPD1_MOUSE	8.81349	9.4e-07
c1088527_g2_i2	NOC2L_BOVIN	8.32976	1.04e-06
c1082467_g1_i1	ZBT11_HUMAN	-8.56903	1.28e-06
c1086350_g2_i3	LMA2L_HUMAN	8.68139	1.56e-06
c1092813_g3_i1	ANXA1_PANTR	6.8266	1.7e-06
c1085797_g1_i1	PKH4B_HUMAN	8.44193	2.97e-06
c1070684_g6_i4	TM100_BOVIN	-9.40732	3.22e-06
c1091969_g1_i2	ATPD_MOUSE	9.18207	3.23e-06
c1085994_g1_i2	SMAP2_CHICK	-8.67096	3.45e-06
c1082222_g1_i3	RBM14_PONAB	-8.42211	3.51e-06
c1073835_g3_i1	PLEK2_MOUSE	2.67216	3.59e-06
c1081608_g4_i3	CO2_BOVIN	4.62945	3.63e-06
c1074983_g4_i1	HID1_HUMAN	8.10846	5.23e-06
c1083368_g1_i1	RENBP_PIG	8.17315	8.67e-06
c1088538_g2_i2	PCDH9_HUMAN	7.92194	9.61e-06
c1049724_g1_i1	DYL1_RAT	3.45307	1.04e-05
c1081071_g2_i3	CNTLN_HUMAN	7.9846	1.44e-05
c1090670_g1_i1	GPD1L_XENTR	9.31934	1.59e-05
c1082738_g2_i2	IF2_KINRD	-4.80754	2.02e-05
c1079696_g1_i2	GAPD1_HUMAN	8.19923	2.11e-05
c1085156_g5_i2	TGM3_MOUSE	5.78957	2.14e-05
c1064453_g2_i3	CSKP_HUMAN	8.02433	2.14e-05
c1078208_g3_i7	AF17_HUMAN	8.66204	2.21e-05
c1064716_g4_i2	P66A_HUMAN	9.04798	2.26e-05
c1079507_g1_i2	STAT1_HUMAN	8.72882	2.7e-05
c1090558_g1_i3	SZT2_HUMAN	8.45855	2.86e-05
c1089406_g2_i1	SOGA2_MOUSE	5.81079	2.87e-05
c1081498_g2_i1	HOOK2_XENLA	8.07563	2.9e-05
c1088192_g4_i4	OASL2_RAT	2.15059	3.02e-05
c1091613_g1_i3	TNR6A_HUMAN	-2.62815	3.02e-05
c1089983_g3_i1	I20RA_HUMAN	8.31769	3.08e-05
c1075955_g1_i3	FBX28_HUMAN	7.83386	3.48e-05
c1078595_g4_i3	DRAM1_MOUSE	5.34951	4.25e-05
c1082870_g1_i3	COR2A_HUMAN	8.10161	4.36e-05
c1080135_g1_i1	IBP2_HUMAN	3.27958	4.45e-05
c1083265_g7_i3	CAV1_DIDVI	-8.15919	4.74e-05
c1080732_g6_i1	TPC11_CHICK	8.13128	5.46e-05
c1041958_g1_i2	LIN1_NYCCO	8.51083	5.94e-05
c1085634_g3_i5	DYN2_MOUSE	8.01051	6.54e-05
c1084825_g1_i7	RFXK_HUMAN	-7.75312	6.73e-05
c1045890_g1_i3	CPE1B_XENLA	8.0513	6.94e-05
c1066879_g2_i2	TRI33_HUMAN	-6.89177	7.58e-05
c1086414_g4_i3	RBL2_HUMAN	-7.89366	7.68e-05
c1087059_g7_i1	PP1B_XENTR	8.27218	8e-05
c1065332_g1_i4	MUC1_YEAST	8.21653	8e-05
c1091000_g1_i3	RAD17_HUMAN	8.05719	8e-05
c1085670_g3_i4	C1GLC_HUMAN	8.70911	8.15e-05
c1072053_g1_i1	UH1BL_XENLA	7.79364	8.75e-05
c1091852_g2_i2	LAMA5_HUMAN	3.30242	9.1e-05
c1062596_g1_i1	CP135_HUMAN	-7.70997	9.19e-05
c1081740_g1_i2	AGAP3_HUMAN	7.19865	9.4e-05
c1043485_g1_i1	BCL3_HUMAN	7.97499	9.6e-05
c1074926_g1_i1	HTF4_MOUSE	7.98966	9.71e-05
c1080285_g4_i4	TXIP1_MOUSE	7.93414	0.000100146
c1079147_g1_i1	ENPP4_HUMAN	7.90739	0.000101543
c1068313_g1_i1	AT7L3_HUMAN	8.23707	0.000101597
c1075036_g3_i9	PKN1_THETN	7.68998	0.000103994
c1069508_g1_i1	CAN15_MOUSE	8.10199	0.000118447
c1079985_g4_i3	GFPT1_RAT	9.05915	0.000122688
c1092764_g1_i2	RTJK_DROFU	-3.59843	0.0001239
c1076698_g3_i9	HNRH3_HUMAN	1.74588	0.000126679
c1057236_g1_i2	IF2M_BOVIN	6.34051	0.000128845
c1086934_g2_i4	CTL1_XENLA	1.92767	0.000151422
c1069931_g5_i2	SORT_HUMAN	2.8104	0.000161274
c1082163_g1_i1	SIAE_HUMAN	2.34192	0.000162676
c1071002_g3_i1	JAK2_PIG	-7.61151	0.000169696
c1090302_g3_i2	MYCPP_HUMAN	-5.57238	0.000186842
c1072766_g2_i3	CSTF2_MOUSE	-7.28003	0.000190248
c1073194_g2_i1	CTDS2_HUMAN	3.11256	0.000197264
c1063672_g5_i2	CDK10_RAT	7.79135	0.000197264
c1087614_g2_i2	RPB1_MOUSE	5.11157	0.000207937
c1081848_g1_i6	FBX21_MOUSE	-7.53449	0.000207937
c1075238_g2_i5	CCNB1_XENLA	3.38375	0.000207937
c1087431_g2_i1	PO22_POPJA	-7.62632	0.000208225
c1058752_g1_i1	K2C5_PANTR	3.16842	0.000219795
c1075894_g6_i6	NUDC3_HUMAN	7.32803	0.000251417
c1084583_g1_i2	KCC2D_CHICK	7.54359	0.000255071
c1086799_g1_i1	SPT2_MOUSE	7.83397	0.000258156
c1088915_g8_i2	F105A_HUMAN	-8.34206	0.000264954
c1080854_g3_i1	POL2_DROME	-8.03648	0.000271391
c1090970_g3_i1	CC032_HUMAN	1.79744	0.000276625
c1085714_g3_i3	RPGF3_HUMAN	7.82971	0.000278998
c1066687_g1_i4	NIT2B_XENLA	7.99609	0.000292195
c1067653_g1_i3	FBX8_HUMAN	7.28573	0.000302603
c1073102_g5_i3	ZY11B_HUMAN	5.53866	0.000361328
c1011949_g1_i1	AR6P1_HUMAN	1.78385	0.000390498
c1084271_g2_i6	PCSK7_HUMAN	6.46732	0.000394582
c966610_g1_i1	PLK1_XENTR	2.61872	0.000456916
c1084816_g1_i3	PTPRD_HUMAN	7.4527	0.000503325
c1080285_g4_i2	TXIP1_MOUSE	-7.68322	0.000511301
c1075894_g6_i4	NUDC3_HUMAN	-7.36814	0.000635058
c1078647_g2_i2	ADAM9_HUMAN	5.84123	0.000643292
c1089084_g2_i1	MNN4_YEAST	1.94792	0.000688214
c1087674_g3_i2	AKA12_HUMAN	-7.51621	0.000735215
c1085810_g6_i1	RS27_RAT	1.22489	0.000735496
c1087186_g1_i2	TPPC3_CHICK	-6.40761	0.000735496
c1072341_g5_i1	OAS2_BOVIN	3.77817	0.000755677
c1083106_g1_i1	CCD51_HUMAN	7.60824	0.000832095
c1077509_g1_i1	CR001_HUMAN	8.13044	0.00090522
c1078542_g1_i1	ZN236_HUMAN	5.54706	0.000913817
c1081108_g2_i7	DDX5_PANTR	7.44936	0.000913817
c1071837_g7_i1	CTCF_CHICK	8.51151	0.000913817
c1079546_g4_i5	PRDX5_MOUSE	6.63309	0.000913817
c1086277_g4_i2	COASY_MOUSE	7.48737	0.000937549
c1089008_g1_i7	GSTM1_HUMAN	1.99666	0.000967529
c1089624_g5_i2	NHSL1_MOUSE	7.44087	0.000991334
c1077415_g7_i1	LIN1_NYCCO	3.80232	0.000998859
c1686431_g1_i1	MUC5B_HUMAN	-3.26809	0.0010527
c1088128_g3_i1	PAR10_HUMAN	1.40295	0.00107744
c1087643_g1_i2	TIPRL_HUMAN	2.40833	0.00108076
c1057474_g1_i2	MKA_XENLA	3.21732	0.00108311
c1090076_g1_i10	MLH3_HUMAN	-7.24916	0.00108388
c1070285_g1_i1	PADI3_HUMAN	2.12299	0.00108505
c1196371_g1_i1	MUC5A_HUMAN	-4.20707	0.00110619
c1073890_g1_i5	TF2H1_HUMAN	7.41613	0.00110628
c1069305_g2_i4	DSRAD_RAT	1.65007	0.00119428
c1062758_g1_i1	GRSF1_MOUSE	4.29948	0.00124782
c1079804_g1_i3	HERC2_HUMAN	6.14169	0.0012751
c1068703_g8_i1	RTP1_HUMAN	2.86826	0.00128096
c1075543_g3_i3	EIF3L_XENTR	1.86535	0.00128565
c1091633_g2_i1	OTOAN_HUMAN	2.00116	0.00140737
c1067752_g6_i1	RNH2B_XENTR	1.69863	0.00146994
c1090840_g1_i1	POL2_MOUSE	-7.15759	0.00152381
c1079913_g3_i4	CTND1_MOUSE	2.41771	0.00160113
c1053868_g1_i3	SNX31_HUMAN	-7.58734	0.00161294
c1064553_g1_i2	POL2_MOUSE	-7.27871	0.00171331
c1069568_g1_i1	JAG1_HUMAN	1.56275	0.00171557
c1074572_g1_i1	NOX1_HUMAN	3.03049	0.00176824
c1080781_g4_i1	ICLN_CANFA	3.36165	0.00179361
c1087057_g2_i4	SCNNA_XENLA	-7.38036	0.00180192
c1091037_g1_i1	IN35_HUMAN	5.86986	0.00195113
c1078033_g1_i3	CC167_XENTR	7.5075	0.00197402
c1089051_g1_i4	FUS_MOUSE	1.42054	0.00198869
c1087744_g1_i2	PLK2_RAT	2.33634	0.00198869
c1082337_g1_i3	POL_WDSV	-7.15754	0.00199896
c1004206_g1_i1	AHNK_HUMAN	1.77655	0.00207916
c1088810_g1_i1	CO7A1_HUMAN	2.86069	0.00215067
c1082586_g1_i2	LIN1_NYCCO	4.63623	0.00215067
c1089152_g1_i6	NUB1_MOUSE	7.1724	0.00215067
c1068681_g4_i2	VDAC2_MELGA	2.26961	0.00242811
c1073457_g2_i2	EMD_MOUSE	1.73925	0.00243487
c1087117_g4_i2	ESRP2_CHICK	2.87687	0.00245455
c1076022_g1_i2	INCEA_XENLA	2.17345	0.00246967
c942925_g2_i1	YI31B_YEAST	6.77659	0.00283713
c1079569_g6_i2	IMA2_HUMAN	3.24596	0.00292787
c1081247_g1_i1	TRXR1_HUMAN	1.37428	0.00295395
c1075559_g1_i1	CENPQ_RAT	6.74556	0.00301379
c1079328_g5_i7	A16L1_HUMAN	7.23276	0.00301379
c1086919_g6_i4	LIFR_CANFA	7.15208	0.00303749
c1078218_g2_i4	H3_URECA	4.04963	0.00312052
c1092764_g1_i1	RTJK_DROFU	-7.10091	0.00325544
c1086307_g1_i1	SULF1_COTCO	7.6173	0.00328916
c1052471_g1_i4	ELP1_HUMAN	-7.01403	0.00333243
c1087391_g1_i5	PP1RA_RAT	-7.23015	0.00337016
c1070934_g2_i5	PSIP1_CHICK	-7.66891	0.00339928
c1053400_g1_i1	PINLY_MOUSE	2.26042	0.00339928
c1091676_g2_i2	RSF1_HUMAN	8.02967	0.00345834
c1090076_g1_i5	MLH3_HUMAN	7.27015	0.00346699
c1076639_g4_i1	RINI_RAT	2.37847	0.00347496
c1072582_g2_i2	GMEB2_RAT	5.65922	0.00347496
c1087751_g1_i1	HNRPK_CHICK	1.38701	0.00347496
c1062596_g1_i2	CP135_HUMAN	4.8441	0.00356217
c1080218_g1_i2	NPC2_PANTR	3.98874	0.00356217
c1081416_g1_i1	RGPA1_HUMAN	7.0065	0.00365587
c1071192_g1_i1	ECLC_BOVIN	1.52395	0.00365587
c1086966_g3_i1	H1_ANAPL	2.05806	0.00366282
c1086285_g2_i5	K1C4_XENLA	3.00195	0.00381389
c1091856_g2_i1	H2B12_XENLA	1.95982	0.00389257
c1082158_g1_i1	CCL4_MACMU	2.78822	0.00396896
c1034130_g2_i3	NAA35_CHICK	-6.95186	0.00401962
c1078928_g10_i3	TCP11_HUMAN	4.40332	0.00413605
c1069936_g1_i4	AIMP1_CRIGR	6.94099	0.00418384
c1070693_g8_i2	P85B_BOVIN	1.14469	0.00421244
c1076686_g6_i1	BRPF3_HUMAN	6.76003	0.00428642
c1060167_g3_i1	MMP3_CANFA	-7.54286	0.00428642
c1055669_g2_i2	ORC6_BOVIN	-7.10785	0.0043805
c1084399_g1_i7	TRAF6_PIG	-6.70275	0.00447683
c1090985_g1_i1	SCF_COTJA	2.03015	0.004534
c1057457_g1_i1	GPC1_CHICK	3.06242	0.004534
c1065606_g2_i1	BUB1_HUMAN	1.73811	0.00456749
c1084789_g3_i2	GCP6_HUMAN	1.57137	0.00469671
c1090877_g2_i3	GPDA_RAT	1.85979	0.00472846
c1084477_g1_i2	INVO_PONPY	1.71267	0.00473498
c1089084_g5_i1	TRHY_HUMAN	2.07292	0.004838
c1091472_g1_i9	PLEC_MOUSE	4.1223	0.00495394
c1089857_g3_i7	GBG7_HUMAN	7.55561	0.00500556
c1092439_g2_i2	ZN410_HUMAN	-8.3586	0.00505112
c1042294_g1_i5	COPZ1_PONAB	2.51609	0.00513214
c1069554_g1_i3	DCE1_FELCA	6.92071	0.00527017
c1091539_g2_i1	POL_WDSV	-5.09275	0.00529461
c1050359_g1_i1	DNLI1_MOUSE	1.85322	0.00540607
c1091932_g3_i1	LIN1_NYCCO	1.42339	0.00542833
c1064539_g2_i1	CCD93_CHICK	6.93348	0.00554555
c1077627_g1_i1	POL3_DROME	2.51979	0.00554555
c1060313_g1_i1	TBCE_XENLA	-6.84963	0.00554555
c1070430_g1_i1	AVR2A_CHICK	1.16228	0.00554555
c1069245_g1_i1	LDHB_MOUSE	2.21442	0.00563657
c1085225_g3_i1	RL30_RAT	1.31573	0.00563657
c1084412_g1_i2	MED16_XENTR	6.95018	0.00582649
c1078733_g1_i3	KLF11_HUMAN	7.22387	0.00600313
c1079019_g3_i1	PDE4B_HUMAN	4.79044	0.00603144
c1082278_g1_i9	INP4A_HUMAN	-5.87226	0.00614793
c1080973_g6_i1	ABRA_PIG	-2.98352	0.00616705
c1090683_g2_i1	HSP13_PONAB	-6.90761	0.0064575
c1086787_g2_i2	KI21B_HUMAN	2.42973	0.00652003
c1085753_g1_i3	PSB8_BOVIN	2.90927	0.00657469
c1088530_g5_i10	WNK1_RAT	-4.33041	0.00660219
c1088502_g4_i1	DTX3L_MOUSE	3.59833	0.00661599
c1089008_g1_i4	GSTM2_MOUSE	1.96546	0.00661599
c1076639_g4_i2	NALP3_MOUSE	2.70372	0.00691178
c1081447_g2_i2	TCF7_MOUSE	-7.12005	0.00692734
c1073696_g2_i3	STAT6_HUMAN	2.89315	0.00692734
c1085203_g6_i2	ASPM_GORGO	2.17882	0.00692734
c1079399_g7_i4	IRF1_CHICK	1.57846	0.00693127
c1090064_g1_i1	RN5A_HUMAN	2.52677	0.00719412
c1073629_g4_i5	FGFR3_PLEWA	-7.14661	0.00720733
c1059974_g3_i2	F120C_MOUSE	8.10429	0.00722394
c1058399_g1_i1	IFI6_PANTR	1.29251	0.0072359
c1078899_g4_i2	LAML2_XENLA	1.7157	0.00749767
c1054856_g2_i5	AL9A1_BOVIN	-6.71961	0.00756708
c1065942_g1_i1	BCAR3_XENLA	6.55067	0.00765702
c1082292_g6_i5	PLS1_RAT	6.68171	0.0078969
c1070004_g1_i4	LIN1_NYCCO	6.82402	0.00805917
c1059800_g1_i4	IKZF5_CHICK	6.90933	0.00816674
c1072862_g8_i3	PK3CB_HUMAN	6.89623	0.00824383
c1090171_g3_i3	MPEG1_HUMAN	3.9986	0.00829974
c1060989_g1_i2	NUP93_BOVIN	2.34647	0.00833859
c1070122_g1_i1	CP2J6_MOUSE	-5.58251	0.00845523
c1086576_g1_i5	SRSF4_MOUSE	3.618	0.00848089
c1077771_g3_i3	KI20A_HUMAN	1.95695	0.00855208
c1068790_g2_i1	TNAP2_HUMAN	1.64314	0.00855208
c1078218_g3_i1	H4_XENTR	2.3208	0.00858709
c1090034_g2_i1	KBTBB_MOUSE	1.67198	0.00860361
c1080325_g1_i4	RLP24_BOVIN	1.60644	0.00860877
c1077593_g1_i1	CA031_HUMAN	6.61679	0.00873561
c1081853_g3_i2	FRAS1_HUMAN	5.08098	0.00876695
c1089704_g2_i1	TREX1_MOUSE	1.66432	0.00883179
c1092323_g3_i3	K1C19_CHICK	2.33329	0.00890872
c1084174_g2_i4	POL2_MOUSE	3.58242	0.00893914
c1085770_g3_i1	NDUB3_BOVIN	6.55889	0.0094335
c1091903_g4_i2	RBMX_XENLA	5.44227	0.0095222
c997285_g1_i1	PROP_HUMAN	1.34471	0.0096536
c1091395_g1_i1	NOTC3_HUMAN	5.71609	0.00973568
c1082982_g1_i1	YI31B_YEAST	-6.89274	0.00975469
c1084704_g3_i3	MIDA_HUMAN	2.9243	0.00982302
c1090840_g1_i4	POLR_DROME	6.62435	0.00994685
c1074794_g1_i5	RTBS_DROME	-6.86883	0.0100912
c1084428_g4_i1	HMGB2_CHICK	1.14231	0.0102014
c1090907_g1_i5	NCPR_HUMAN	7.03348	0.0102048
c1087705_g1_i2	ELF3_MOUSE	1.89963	0.0102122
c1067312_g1_i2	RENT1_HUMAN	1.248	0.0104349
c1089116_g1_i2	MBIP1_HUMAN	6.62643	0.0105718
c1079345_g4_i2	TOE1_BOVIN	-6.76139	0.0109693
c1089008_g1_i6	CNN3_HUMAN	1.54589	0.0111718
c1088349_g1_i1	P4K2A_XENTR	2.57561	0.0111976
c1091037_g1_i4	IN35_HUMAN	3.17044	0.0114752
c1083693_g1_i3	ES1_MOUSE	-7.03789	0.0114752
c1063665_g1_i1	OASL2_RAT	2.52855	0.0114752
c1090619_g1_i3	TSN3_PONAB	3.03558	0.0117303
c1083370_g4_i1	TNF10_HUMAN	1.29105	0.0118501
c1078228_g4_i2	SPHK1_HUMAN	7.03124	0.01206
c1086753_g6_i1	RAN_CHICK	1.29222	0.0123066
c1087578_g2_i1	SRSF2_RAT	1.52108	0.0124361
c1090719_g1_i3	HDC_HUMAN	-7.06029	0.0124458
c1078622_g1_i3	SI1L3_HUMAN	7.36812	0.0124742
c813921_g1_i1	VPS35_HUMAN	1.24348	0.0128232
c1085379_g2_i1	PPME1_HUMAN	6.60341	0.0128232
c1089898_g1_i4	PPN_HUMAN	1.61496	0.0129494
c1066177_g1_i2	RBM15_HUMAN	3.78442	0.0129494
c1076639_g2_i1	NALP3_BOVIN	2.09262	0.0132308
c1063703_g3_i1	PSMD9_HUMAN	1.81484	0.0133463
c1085849_g10_i3	MT21D_MOUSE	6.43812	0.0133463
c1060313_g1_i2	TBCE_XENLA	3.6753	0.0133552
c1067967_g1_i2	PLCX1_HUMAN	-6.62581	0.0134775
c1085057_g1_i1	TSP3_HUMAN	2.85116	0.0136543
c1090613_g1_i1	TSTD3_MOUSE	1.44433	0.0136759
c1087710_g1_i3	CTR2_HUMAN	3.27472	0.0137258
c1075336_g5_i1	PSME3_CHICK	6.95525	0.0138293
c1083101_g4_i3	SYTL5_HUMAN	1.24909	0.0139193
c1081020_g2_i4	TACC3_XENLA	1.60957	0.0140367
c944179_g3_i1	G_BPPHX	-1.03845	0.0144396
c1081937_g4_i2	RAPH1_HUMAN	-6.71973	0.0144396
c1085524_g4_i1	SPTB2_HUMAN	-6.66561	0.0155188
c1046955_g1_i1	LIN1_NYCCO	11.2166	0.0164336
c1070510_g2_i1	CLD4_BOVIN	3.18598	0.0166195
c1083230_g2_i16	RIN2_HUMAN	-6.66294	0.0170254
c1077243_g4_i6	AN32A_BOVIN	2.4007	0.017332
c1074686_g3_i1	CCL28_MOUSE	2.07059	0.017332
c1085378_g2_i2	LIN1_NYCCO	1.67542	0.0179564
c1035626_g1_i2	SUMF1_BOVIN	3.29068	0.0181379
c1077789_g1_i1	RTN3_PONAB	1.13033	0.0181468
c1085891_g3_i1	MUS81_XENTR	-4.34033	0.0182846
c1083720_g4_i17	NPHP4_HUMAN	-6.79598	0.0183706
c1091411_g4_i1	MUC5A_HUMAN	-2.99911	0.0183763
c1082360_g11_i1	AATM_XENTR	3.39444	0.0187756
c1085228_g6_i1	FAT1_HUMAN	3.13722	0.0194733
c1086374_g1_i6	PALLD_HUMAN	2.02717	0.0194733
c1078218_g3_i3	H4_XENTR	2.03349	0.0197459
c1070626_g1_i3	ANO6_HUMAN	1.60321	0.0199599
c1073993_g3_i5	MICU1_XENTR	1.6993	0.0200312
c1070969_g1_i2	CDC20_MOUSE	2.41237	0.0202687
c1086823_g4_i1	PAR12_HUMAN	1.52756	0.0207487
c998939_g2_i1	ACTG_XENTR	1.56093	0.0207615
c1091239_g5_i1	CAN1_RAT	2.01037	0.0207615
c1088546_g3_i7	TM143_HUMAN	5.68772	0.0211608
c1075784_g3_i1	S12A6_HUMAN	1.14628	0.0214659
c1085992_g1_i3	RTF21_SCHPO	3.22429	0.0220335
c1084274_g1_i3	CH033_DANRE	-6.50787	0.0220335
c1067816_g3_i4	PTPS_HUMAN	-4.69291	0.0220335
c1074202_g1_i2	EPRA1_AERHY	2.66356	0.0220918
c1060160_g1_i1	VPS41_HUMAN	1.12472	0.0221041
c1086520_g2_i6	RM55_MOUSE	6.59582	0.0223107
c1066947_g1_i2	PITM2_HUMAN	7.49716	0.0223304
c1088669_g1_i1	PYGL_SHEEP	1.31202	0.0225555
c1056124_g1_i1	VRK1_MOUSE	1.7428	0.0226079
c1087063_g1_i1	PEBP1_BOVIN	1.14193	0.0228665
c1063644_g1_i1	GAT1B_XENLA	-6.96178	0.0230771
c1085161_g2_i8	FKB1B_HUMAN	6.77389	0.0230771
c1091948_g1_i1	TRNK1_HUMAN	2.42326	0.0231187
c1062755_g1_i1	CYLD_RAT	5.32842	0.0231187
c1085159_g2_i2	ACY3_HUMAN	5.18178	0.0233509
c1082160_g1_i6	NEK3_HUMAN	6.57931	0.0233851
c1091502_g1_i4	SPRC_PIG	2.22519	0.0237045
c1089084_g4_i1	PAR14_MOUSE	1.98654	0.0237217
c1086874_g10_i2	CTHR1_RAT	6.45862	0.023743
c1088557_g1_i4	NMI_MOUSE	2.2657	0.0243053
c1089399_g1_i11	POL4_DROME	6.56477	0.0246054
c1089878_g1_i3	RALBB_XENLA	1.66696	0.0248026
c1070001_g1_i4	RBGP1_PONAB	4.78707	0.0248171
c1087982_g1_i1	RTF23_SCHPO	-1.61215	0.0248628
c1087435_g1_i2	POF1B_MOUSE	1.0317	0.0251217
c1077702_g1_i1	MUC19_HUMAN	-4.19924	0.0252762
c1034855_g2_i1	SDA1_MOUSE	1.08741	0.0255048
c1041953_g1_i1	POTEJ_HUMAN	1.18098	0.0256175
c1079465_g6_i1	SRPX_HUMAN	2.88993	0.0258714
c1088836_g1_i1	DOCK5_HUMAN	-7.07512	0.0259593
c1088527_g2_i3	NOC2L_BOVIN	-7.36127	0.0259603
c683108_g1_i1	VGD_BPS13	-1.0512	0.0262298
c1055187_g1_i3	UPAR_RAT	-6.5058	0.0262844
c1054497_g2_i1	SNX2_HUMAN	1.32396	0.0264632
c1091662_g2_i5	P55G_HUMAN	3.74152	0.0266732
c1089436_g4_i3	GIN1_HUMAN	-4.57407	0.0267151
c1064180_g11_i1	TGM3L_HUMAN	-1.20074	0.0267782
c1080662_g1_i3	MITD1_RAT	1.50965	0.0268727
c1078218_g2_i7	H3_URECA	1.9781	0.026973
c1078598_g1_i2	GRP78_RAT	3.91359	0.0271489
c1054565_g1_i1	ACAD9_HUMAN	1.21873	0.0274057
c1073873_g2_i1	AHNK_HUMAN	1.55349	0.0276834
c1075328_g2_i2	HTAI2_GORGO	2.02525	0.0276834
c1091288_g1_i1	S26A4_RAT	4.54835	0.0280331
c1084583_g1_i3	KCC2D_CHICK	1.37976	0.0283783
c1091062_g2_i1	K2C5_RAT	1.53393	0.0283783
c1068517_g3_i3	POL3_DROME	-5.57346	0.028406
c1089084_g1_i1	MYBX_DICDI	2.00343	0.0289136
c944179_g5_i1	REPA_BPPHX	-0.99994	0.0296287
c1071302_g1_i1	PX11B_MOUSE	6.53278	0.0299787
c1089402_g2_i1	IRF3_CHICK	1.41232	0.0299787
c1085422_g2_i2	TRI56_HUMAN	1.68858	0.0300578
c1072488_g1_i6	NINL_MOUSE	1.36855	0.0301596
c1083786_g2_i6	EMAL4_MOUSE	1.40068	0.0301826
c1077627_g1_i2	POL3_DROME	2.06979	0.0303057
c1082866_g1_i2	FCN1_PIG	2.75749	0.0306381
c1086142_g1_i5	T194B_CHICK	-6.42305	0.0309278
c1091037_g1_i7	IN35_HUMAN	2.66813	0.0313432
c1079342_g1_i1	PKP3_BOVIN	1.13472	0.0315689
c1087788_g3_i6	PAR14_HUMAN	1.64548	0.031637
c1088831_g3_i1	LIN1_NYCCO	-1.85255	0.0323517
c1089131_g1_i1	CRLD2_MOUSE	3.03857	0.0324799
c1073102_g5_i1	ZY11B_HUMAN	-4.7234	0.0327895
c1091920_g1_i3	NFH_HUMAN	1.52778	0.0328533
c1072351_g2_i2	FKBP7_PONAB	1.91012	0.0329547
c1076861_g3_i1	CCA5B_XENLA	1.85625	0.0330598
c1080270_g3_i4	ZBT46_HUMAN	1.19752	0.0332686
c1088101_g1_i3	VPS8_HUMAN	4.92576	0.033292
c1062356_g1_i1	OLA1_XENTR	1.12645	0.0335334
c1083615_g4_i1	LIN1_NYCCO	-2.85849	0.0337171
c1067839_g2_i1	TBFG_EPTST	2.08873	0.033867
c1091100_g3_i1	FINC_XENLA	3.06262	0.0344123
c1062507_g1_i3	UBB_SHEEP	1.14725	0.0347895
c1081950_g2_i1	PTTG_PONAB	1.10661	0.0347895
c1083123_g2_i1	IFIH1_HUMAN	1.7456	0.0350227
c1092564_g1_i1	JADE2_MOUSE	7.49621	0.0354554
c1082828_g4_i1	TTK_MACFA	1.93698	0.0355306
c1070684_g6_i5	TM100_BOVIN	-3.79656	0.0359213
c1070043_g1_i1	MALT1_HUMAN	1.30688	0.0359936
c1078587_g3_i2	RL39_CHICK	1.1024	0.0362359
c1088087_g4_i1	GPC6_MOUSE	2.02321	0.0362359
c1061279_g1_i1	RN145_MOUSE	2.67378	0.0364709
c1078935_g3_i2	SYK_MOUSE	1.11154	0.036487
c1084426_g1_i1	TRI27_MOUSE	1.51424	0.0367422
c1069540_g1_i6	T150C_HUMAN	2.56626	0.0367422
c1091658_g2_i2	SSRA_MOUSE	1.89827	0.036772
c1075607_g1_i2	LSR_MOUSE	2.07103	0.0368426
c1081788_g2_i2	GALT1_HUMAN	1.97871	0.0370516
c1082600_g4_i5	HNRPL_MOUSE	1.45043	0.0371575
c1084918_g1_i3	NP1L1_XENTR	1.08577	0.0373002
c1077573_g4_i3	RLA0_CHICK	2.54599	0.0373002
c1086862_g2_i1	CLCB_HUMAN	1.63766	0.0373002
c1070178_g2_i1	PKP1_HUMAN	1.16466	0.0383247
c1076035_g2_i2	WDR76_XENLA	-6.75417	0.0385311
c1083030_g4_i7	CD63_RAT	5.6674	0.038655
c1090257_g1_i1	TSN15_MOUSE	2.1235	0.0387156
c1078218_g3_i4	H4_XENTR	2.05433	0.0388058
c1071925_g7_i3	DPH3_MOUSE	6.31253	0.0389021
c1076288_g1_i1	RBM12_MOUSE	3.47294	0.0389021
c1057844_g1_i4	HMGB3_CHICK	1.27663	0.0389021
c1089534_g1_i3	MREG_HUMAN	3.65993	0.0391143
c1088192_g7_i1	OASL2_MOUSE	3.13948	0.0392759
c1089376_g10_i5	CLC2D_HUMAN	1.57452	0.0399053
c1084293_g1_i1	MPZL2_BOVIN	1.35273	0.0401761
c1078436_g9_i1	RS13_XENLA	0.96331	0.0402551
c1085370_g3_i2	RL23A_RAT	0.908953	0.0402551
c1081417_g1_i4	ALAT2_XENLA	1.18557	0.0402551
c1077513_g4_i4	ERI2_XENLA	2.10995	0.0402659
c1090319_g5_i1	POL2_MOUSE	1.94799	0.0402659
c1092622_g3_i1	CMLO5_RAT	1.32114	0.0402659
c1090757_g1_i2	GDPD2_MOUSE	1.99366	0.0406555
c1081069_g1_i3	FOXP4_HUMAN	2.24091	0.0412576
c1074804_g3_i7	KIF23_HUMAN	5.48474	0.0413089
c1086627_g4_i2	RIHA_ECOHS	1.31478	0.0413089
c1680103_g1_i1	GP1_CHLRE	-3.81283	0.0416118
c1087087_g2_i2	NDRG2_XENTR	1.16362	0.0417212
c1089787_g13_i1	NF7B_XENLA	1.59184	0.0421408
c1083046_g1_i1	AAMP_BOVIN	1.63743	0.0421408
c1083975_g1_i1	FAT2_HUMAN	1.36405	0.0421895
c1083200_g2_i3	K1C17_BOVIN	1.59189	0.0421925
c1086134_g3_i1	SMYD3_MOUSE	2.03931	0.0424477
c926464_g1_i2	ATP5I_MOUSE	1.3917	0.0432955
c1082905_g1_i4	PAR1_XENLA	6.52572	0.0434148
c1090074_g7_i1	MOV10_CHICK	1.75579	0.043629
c1087951_g3_i2	FABP5_MOUSE	1.21484	0.0444831
c1079274_g1_i2	NOXO1_MOUSE	2.12881	0.0463547
c1091608_g1_i1	NAV1_HUMAN	1.1987	0.0468766
c1077266_g3_i1	SMYD3_HUMAN	2.35191	0.0470563
c1092570_g1_i1	HBA_TARGR	-1.76229	0.0470563
c1084331_g1_i1	P53_ICTPU	5.28761	0.0470563
c1092323_g3_i1	K1C19_CHICK	2.65138	0.0471817
c1177582_g1_i1	F_BPPHX	-1.02528	0.0475481
c1088857_g3_i3	IF2G_HUMAN	2.44437	0.047776
c1090666_g1_i5	PLEC_MOUSE	2.62825	0.0479822
c1088162_g2_i2	DEP1A_XENLA	1.53878	0.0482931
c1082751_g2_i4	NREP_CHICK	2.66154	0.0484368
c1081836_g1_i1	TRI44_HUMAN	1.93473	0.0486482
c1087685_g5_i2	CALM_XENLA	1.13683	0.0490319
c1092223_g1_i1	PDZD2_HUMAN	1.47204	0.0491497
